# Supplementary material for: Clinical characteristics and novel mutations of omicron subvariant XBB in Tamil Nadu, India – a cohort study
Source: PubMed Central journal article supplement (PMC10709680; doi:10.1016/j.lansea.2023.100272), 2023-09-04
Supplement: mmc1.pdf [file mmc1.pdf]

**Novel mutations in XBB variants of SARS-CoV-2 decipher high rates of morbidity among COVID-19 patients in South India**

**Supplemental Table 1:** Regional distribution of SARS-CoV-2 Omicron XBB sub-lineages (n=244).

| S. No | District           | Omicron XBB sub-variants |           |           |            |          | Total      |
|-------|--------------------|--------------------------|-----------|-----------|------------|----------|------------|
|       |                    | XBB                      | XBB.1     | XBB.2     | XBB.3      | XBB.5    |            |
| 1     | Chennai            | 10                       | 29        | 7         | 77         | 0        | 123        |
| 2     | Coimbatore         | 0                        | 6         | 3         | 9          | 0        | 18         |
| 3     | Kanchipuram        | 0                        | 3         | 1         | 8          | 1        | 13         |
| 4     | Tiruvannamalai     | 0                        | 2         | 0         | 10         | 0        | 12         |
| 5     | Erode              | 0                        | 1         | 1         | 10         | 0        | 12         |
| 6     | Thiruvallur        | 1                        | 1         | 0         | 6          | 0        | 8          |
| 7     | Chengalpattu       | 0                        | 2         | 3         | 2          | 0        | 7          |
| 8     | Tiruchirappalli    | 1                        | 2         | 0         | 2          | 1        | 6          |
| 9     | Madurai            | 3                        | 1         | 0         | 1          | 0        | 5          |
| 10    | Salem              | 0                        | 3         | 1         | 0          | 1        | 5          |
| 11    | Villupuram         | 1                        | 1         | 0         | 2          | 0        | 4          |
| 12    | Perambalur         | 1                        | 0         | 0         | 1          | 2        | 4          |
| 13    | Ranipet            | 1                        | 0         | 0         | 3          | 0        | 4          |
| 14    | Ramanathapuram     | 2                        | 0         | 0         | 1          | 0        | 3          |
| 15    | Tirunelveli        | 1                        | 0         | 0         | 2          | 0        | 3          |
| 16    | Kanyakumari        | 1                        | 1         | 1         | 0          | 0        | 3          |
| 17    | Tiruppur           | 0                        | 0         | 1         | 1          | 0        | 2          |
| 18    | Dindigul           | 1                        | 0         | 0         | 1          | 0        | 2          |
| 19    | Vellore            | 1                        | 1         | 0         | 0          | 0        | 2          |
| 20    | Pudukottai         | 0                        | 0         | 1         | 0          | 0        | 1          |
| 21    | Virudhunagar       | 0                        | 0         | 0         | 1          | 0        | 1          |
| 22    | Thanjavur          | 0                        | 0         | 0         | 1          | 0        | 1          |
| 23    | The Nilgiris       | 0                        | 0         | 1         | 0          | 0        | 1          |
| 24    | Thoothukudi        | 0                        | 1         | 0         | 0          | 0        | 1          |
| 25    | Theni              | 0                        | 1         | 0         | 0          | 0        | 1          |
| 26    | Ariyalur           | 0                        | 0         | 0         | 1          | 0        | 1          |
| 27    | Thiruvarur         | 0                        | 1         | 0         | 0          | 0        | 1          |
|       | <b>Grand total</b> | <b>24</b>                | <b>56</b> | <b>20</b> | <b>139</b> | <b>5</b> | <b>244</b> |

**Supplemental Table 2A:** Age-wise distribution of SARS-CoV-2 Omicron XBB sub-lineages (n=244)

| Age group<br>(in years) | Omicron XBB sub-variants |           |            |            |          |            | Percentage |
|-------------------------|--------------------------|-----------|------------|------------|----------|------------|------------|
|                         | XBB                      | XBB.1     | XBB.2      | XBB.3      | XBB.5    | Total      |            |
| 0-12                    | 0                        | 2         | 0          | 3          | 0        | 5          | 2.04       |
| 13-18                   | 0                        | 2         | 0          | 4          | 0        | 6          | 2.45       |
| 19-30                   | 06                       | 11        | 4          | 35         | 2        | 58         | 23.77      |
| 31-50                   | 7                        | 20        | 5          | 44         | 2        | 77         | 31.55      |
| 51-65                   | 5                        | 10        | 4          | 22         | 0        | 41         | 16.8       |
| >65                     | 6                        | 12        | 7          | 31         | 1        | 57         | 23.36      |
| <b>Total</b>            | <b>24</b>                | <b>56</b> | <b>20</b>  | <b>139</b> | <b>5</b> | <b>244</b> | <b>100</b> |
| <b>Percentage</b>       | <b>9.8</b>               | <b>23</b> | <b>8.2</b> | <b>57</b>  | <b>2</b> | <b>100</b> |            |

**Supplemental Table 2B:** Gender-wise distribution of SARS-CoV-2 Omicron XBB sub-lineages (n=244)

| Age group         | Omicron XBB sub-variants |           |            |           |          |            | Percentage |
|-------------------|--------------------------|-----------|------------|-----------|----------|------------|------------|
|                   | XBB                      | XBB.1     | XBB.2      | XBB.3     | XBB.5    | Total      |            |
| Male              | 13                       | 31        | 12         | 69        | 3        | 128        | 52         |
| Female            | 11                       | 25        | 8          | 70        | 2        | 116        | 48         |
| Total             | 24                       | 56        | 20         | 139       | 5        | 244        | 100        |
| <b>Percentage</b> | <b>9.8</b>               | <b>23</b> | <b>8.2</b> | <b>57</b> | <b>2</b> | <b>100</b> |            |

**Supplemental Table 3:** Type of vaccines administered in the study group (n=244)

| Vaccine ID     | Proprietary name | Manufacturer                                                                                                                                                                      | Type of vaccine                   | Mode of Administration  | Characteristics                                                                                                                       | No. of cases | Percentage |
|----------------|------------------|-----------------------------------------------------------------------------------------------------------------------------------------------------------------------------------|-----------------------------------|-------------------------|---------------------------------------------------------------------------------------------------------------------------------------|--------------|------------|
| AZD1222        | Covishield™      | Serum Institute of India Pvt Ltd and COVID-19 vaccine AstraZeneca (AstraZeneca)                                                                                                   | Recombinant                       | Intramuscular injection | Recombinant, replication-deficient chimpanzee adenovirus vector encoding the SARS-CoV-2 spike (S) glycoprotein                        | 141          | 58         |
| BBV152         | Covaxin®         | Bharath Biotech                                                                                                                                                                   | Inactivated viron                 | Intramuscular injection | β-propiolactone inactivated vaccine                                                                                                   | 43           | 18         |
| BNT162B2       | Pfizer-BioNTech  | Pfizer and BioNTech                                                                                                                                                               | Messenger RNA (mRNA) vaccine      | Intramuscular injection | Messenger RNA (mRNA) vaccine uses a genetic code called RNA to make your body's cells produce the coronavirus' specific spike protein | 10           | 4          |
| mRNA1273       | Spikevax         | American company Moderna, the United States National Institute of Allergy and Infectious Diseases (NIAID), and the Biomedical Advanced Research and Development Authority (BARDA) | Nucleoside-modified mRNA (modRNA) | Intramuscular injection | Lipid nanoparticle-encapsulated mRNA-based vaccine                                                                                    | 4            | 2          |
| Not vaccinated |                  |                                                                                                                                                                                   |                                   |                         |                                                                                                                                       | 44           | 18         |
| Unknown        |                  |                                                                                                                                                                                   |                                   |                         |                                                                                                                                       | 2            | 1          |
| <b>Total</b>   |                  |                                                                                                                                                                                   |                                   |                         |                                                                                                                                       | <b>244</b>   |            |

**Supplemental Table 4A:** Underlying conditions among individuals infected with SARS-CoV-2 Omicron XBB sub-lineages (n=244)

| S. No | Underlying condition        | Omicron XBB sub-variants |       |       |       |       | Total | Percentage |
|-------|-----------------------------|--------------------------|-------|-------|-------|-------|-------|------------|
|       |                             | XBB                      | XBB.1 | XBB.2 | XBB.3 | XBB.5 |       |            |
| 1     | Diabetes mellitus           | 5                        | 8     | 4     | 21    | 0     | 38    | 15.6       |
| 2     | Hypertension                | 4                        | 5     | 3     | 17    | 1     | 30    | 12.3       |
| 3     | Cardiovascular disease      | 1                        | 1     | 0     | 8     | 2     | 12    | 4.9        |
| 4     | Thyroid dysfunction         | 0                        | 1     | 0     | 2     | 0     | 3     | 1.2        |
| 5     | Hyponatraemia               | 0                        | 0     | 0     | 2     | 0     | 2     | 0.8        |
| 6     | Parkinson's disease         | 0                        | 0     | 0     | 2     | 0     | 2     | 0.8        |
| 7     | Asthma                      | 0                        | 0     | 0     | 2     | 0     | 2     | 0.8        |
| 8     | Arthritis                   | 0                        | 1     | 0     | 0     | 0     | 1     | 0.4        |
| 9     | Sinusitis                   | 0                        | 0     | 0     | 1     | 0     | 1     | 0.4        |
| 10    | Seizures                    | 0                        | 0     | 0     | 0     | 1     | 1     | 0.4        |
| 11    | Polycythemia                | 1                        | 0     | 0     | 0     | 0     | 1     | 0.4        |
| 12    | Chronic liver disease       | 0                        | 0     | 0     | 0     | 1     | 1     | 0.4        |
| 13    | Lower respiratory infection | 0                        | 0     | 0     | 1     | 0     | 1     | 0.4        |
| 14    | Pneumonia                   | 0                        | 0     | 1     | 0     | 0     | 1     | 0.4        |
| 15    | Upper respiratory infection | 0                        | 0     | 0     | 1     | 0     | 1     | 0.4        |
| 16    | No underlying condition     | 15                       | 43    | 15    | 101   | 3     | 177   | 73         |
| 17    | Unknown                     | 0                        | 2     | 0     | 0     | 0     | 2     | 0.8        |

**Supplemental Table 4B:** Underlying conditions among individuals infected with SARS-CoV-2 Omicron XBB sub-lineages (n=244)

| S. No | Underlying condition                  | Omicron XBB sub-variants |           |           |            |          | Total      | Percentage |
|-------|---------------------------------------|--------------------------|-----------|-----------|------------|----------|------------|------------|
|       |                                       | XBB                      | XBB.1     | XBB.2     | XBB.3      | XBB.5    |            |            |
| 1     | Diabetes mellitus (DM)                | 3                        | 3         | 1         | 10         | 0        | 17         | 7          |
| 2     | DM+hypertension (HTN)                 | 1                        | 4         | 3         | 7          | 0        | 15         | 6.1        |
| 3     | HTN                                   | 3                        | 1         | 0         | 5          | 0        | 9          | 3.7        |
| 4     | Cardiovascular disease (CVD)          | 0                        | 0         | 0         | 4          | 0        | 4          | 1.6        |
| 5     | DM+CVD                                | 1                        | 1         | 0         | 0          | 0        | 2          | 0.8        |
| 6     | DM+HTN+CVD                            | 0                        | 0         | 0         | 2          | 0        | 2          | 0.8        |
| 7     | HTN+CVD                               | 0                        | 0         | 0         | 2          | 0        | 2          | 0.8        |
| 8     | Thyroid dysfunction (TD)              | 0                        | 1         | 0         | 1          | 0        | 2          | 0.8        |
| 9     | Arthritis                             | 0                        | 1         | 0         | 0          | 0        | 1          | 0.4        |
| 10    | Asthma+sinusitis                      | 0                        | 0         | 0         | 1          | 0        | 1          | 0.4        |
| 11    | CVD+seizures                          | 0                        | 0         | 0         | 0          | 1        | 1          | 0.4        |
| 12    | DM+hyponatremia                       | 0                        | 0         | 0         | 1          | 0        | 1          | 0.4        |
| 13    | DM+TD+asthma                          | 0                        | 0         | 0         | 1          | 0        | 1          | 0.4        |
| 14    | Polycythemia                          | 1                        | 0         | 0         | 0          | 0        | 1          | 0.4        |
| 15    | HTN+CVD+ chronic liver disease (CLD)  | 0                        | 0         | 0         | 0          | 1        | 1          | 0.4        |
| 16    | HTN+Lower respiratory infection (LRI) | 0                        | 0         | 0         | 1          | 0        | 1          | 0.4        |
| 17    | Parkinsons disease (PD)               | 0                        | 0         | 0         | 1          | 0        | 1          | 0.4        |
| 18    | PD+hyponatraemia                      | 0                        | 0         | 0         | 1          | 0        | 1          | 0.4        |
| 19    | Pneumonia                             | 0                        | 0         | 1         | 0          | 0        | 1          | 0.4        |
| 20    | Upper respiratory infection (URI)     | 0                        | 0         | 0         | 1          | 0        | 1          | 0.4        |
| 21    | No underlying condition               | 15                       | 43        | 15        | 101        | 3        | 177        | 72.5       |
| 22    | Unknown                               | 0                        | 2         | 0         | 0          | 0        | 2          | 0.8        |
|       | <b>Grand total</b>                    | <b>24</b>                | <b>56</b> | <b>20</b> | <b>139</b> | <b>5</b> | <b>244</b> | <b>100</b> |

**Supplemental Table 5A:** Severity of illness in SARS-CoV-2 Omicron sub-variant infected individuals (n=244)

| Clinical illness | Omicron XBB sub-variants reported |       |       |       |       |       | Percentage |
|------------------|-----------------------------------|-------|-------|-------|-------|-------|------------|
|                  | XBB                               | XBB.1 | XBB.2 | XBB.3 | XBB.5 | Total |            |
| Asymptomatic     | 5                                 | 14    | 4     | 31    | 1     | 55    | 22.6       |
| Mild             | 15                                | 31    | 12    | 91    | 2     | 151   | 61.9       |
| Moderate         | 1                                 | 7     | 3     | 13    | 0     | 24    | 9.8        |
| Severe           | 3                                 | 4     | 1     | 4     | 2     | 14    | 5.7        |
| Total            | 24                                | 56    | 20    | 139   | 5     | 244   | 100        |

**Supplemental Table 5B:** Clinical course of illness in SARS-CoV-2 Omicron sub-variant infected individuals (n=244)

| Clinical illness               | Omicron XBB sub-variants reported |       |       |       |       |       | Percentage |
|--------------------------------|-----------------------------------|-------|-------|-------|-------|-------|------------|
|                                | XBB                               | XBB.1 | XBB.2 | XBB.3 | XBB.5 | Total |            |
| <b>Hospitalization</b>         | 7                                 | 12    | 6     | 40    | 4     | 69    | 28%        |
| Without O <sub>2</sub> support | 6                                 | 11    | 5     | 39    | 4     | 65    | 94%        |
| With O <sub>2</sub> support    | 1                                 | 1     | 1     | 1     | 0     | 4     | 6%         |

**Supplemental Table 5C:** Clinical course of illness in SARS-CoV-2 Omicron sub-variant infected individuals (n=244)

| Clinical illness        | Omicron XBB sub-variants reported |       |       |       |       |       | Percentage |
|-------------------------|-----------------------------------|-------|-------|-------|-------|-------|------------|
|                         | XBB                               | XBB.1 | XBB.2 | XBB.3 | XBB.5 | Total |            |
| <b>Hospitalization</b>  | 7                                 | 12    | 6     | 40    | 4     | 69    | 28%        |
| Without ICU/HDU support | 6                                 | 11    | 6     | 38    | 2     | 63    | 91%        |
| With ICU/HDU support    | 1                                 | 1     | 0     | 2     | 2     | 6     | 9%         |

**Supplemental Table 5D:** Clinical course of illness in SARS-CoV-2 Omicron sub-variants infected individuals (n=244)

| Clinical illness            | Omicron XBB sub-variants reported |                  |                  |                                 |       |       |
|-----------------------------|-----------------------------------|------------------|------------------|---------------------------------|-------|-------|
|                             | XBB                               | XBB.1            | XBB.2            | XBB.3                           | XBB.5 | Total |
| <b>Hospitalization</b>      | 0                                 | 0                | 0                | 1 (Mild)                        | 0     | 1     |
| With O <sub>2</sub> support | 1 (severe)                        | 0                | 0                | 0                               | 0     | 1     |
| Under ICU/HDU care          | 0                                 | 1 (asymptomatic) | 0                | 0                               | 0     | 1     |
| No hospitalization          | 0                                 | 0                | 1 (asymptomatic) | 2 (1 asymptomatic & 1 moderate) | 0     | 3     |
| <b>Total</b>                | 1                                 | 1                | 1                | 3                               | 2     | 6     |

**Supplemental Table 6:** Characteristics of mutation detected from SARS-CoV-2 sub-lineages of XBB (including two unique mutations (n=98) highlighted in yellow and green).

| Sample ID | GeneBank Accession ID | Sub-lineages reported | Mutations detected                                                                                                                                                                                                                                                                                                                                                                                                                                                                                                                                                                                                                                                                                                                                     |
|-----------|-----------------------|-----------------------|--------------------------------------------------------------------------------------------------------------------------------------------------------------------------------------------------------------------------------------------------------------------------------------------------------------------------------------------------------------------------------------------------------------------------------------------------------------------------------------------------------------------------------------------------------------------------------------------------------------------------------------------------------------------------------------------------------------------------------------------------------|
| 18        | OQ587517              | <b>XBB.3</b>          | M:Q19E, M:A63T, N:P13L, N:R203K, N:G204R, N:S413R, ORF1a:K47R, ORF1a:G82D, ORF1a:S135R, ORF1a:T842I, ORF1a:G1307S, ORF1a:L3027F, ORF1a:T3090I, ORF1a:L3201F, ORF1a:T3255I, ORF1a:P3395H, ORF1b:P314L, ORF1b:G662S, ORF1b:S959P, ORF1b:R1315C, ORF1b:I1566V, ORF1b:I1998V, ORF1b:T2163I, ORF3a:T223I, ORF6:D61L, ORF9b:P10S, S:T19I                                                                                                                                                                                                                                                                                                                                                                                                                     |
| 19        | OQ569687              | <b>XBB.3</b>          | E:T11A, M:Q19E, M:A63T, N:P13L, N:R203K, N:G204R, N:S413R, ORF1a:K47R, ORF1a:G82D, ORF1a:S135R, ORF1a:T842I, ORF1a:G1307S, ORF1a:L3027F, ORF1a:T3090I, ORF1a:L3201F, ORF1a:T3255I, ORF1a:P3395H, ORF1b:P314L, ORF1b:G662S, ORF1b:S959P, ORF1b:R1315C, ORF1b:I1566V, ORF1b:I1998V, ORF1b:T2163I, ORF3a:T223I, ORF6:D61L, ORF9b:P10S, S:T19I, S: <b>A27S</b> , S:F86I, S:G142D, S:H146Q, S:Q183E, S:V213E, S:G339H, S:R346T, S:L368I, S:S371F, S:S373P, S:S375F, S:T376A, S:D405N, S:R408S, S:K417N, S:N440K, S:V445, S:G446S, S:N460K, S:S477N, S:T478K, S:E484A, S:F486S, S:F490S, S:Q498R, S:D614G, S:H655Y, S:N679KF, S:P681H, S:N764K, S:D796Y, S:Q954H                                                                                             |
| 24        | OQ569688              | <b>XBB.3</b>          | E:T11A, M:Q19E, M:A63T, N:P13L, N:R203K, N:G204R, N:S413R, ORF1a:K47R, ORF1a:G82D, ORF1a:S135R, ORF1a:T842I, ORF1a:G1307S, ORF1a:L3027F, ORF1a:T3090I, ORF1a:L3201F, ORF1a:T3255I, ORF1a:P3395H, ORF1b:P314L, ORF1b:G662S, ORF1b:S959P, ORF1b:R1315C, ORF1b:I1566V, ORF1b:I1998V, ORF1b:T2163I, ORF3a:T223I, ORF6:D61L, ORF9b:P10S, S:T19I, S: <b>A27S</b> , S:G142D, S:H146Q, S:Q183E, S:V213E, S:D215Y, S:G339H, S:R346T, S:L368I, S:S371F, S:S373P, S:S375F, S:T376A, S:D405N, S:R408S, S:K417N, S:N440K, S:V445P, S:G446S, S:N460K, S:S477N, S:T478K, S:E484A, S:F486S, S:F490S, S:Q498R, S:N501Y, S:Y505H, S:D614G, S:H655Y, S:N679K, S:P681H, S:N764K, S:D796Y, S:Q954H                                                                          |
| 27        | OQ587518              | <b>XBB.5</b>          | E:T11A, M:Q19E, M:A63T, N:P13L, N:R203K, N:G204R, N:T245I, N:S413R, ORF1a:K47R, ORF1a:G82D, ORF1a:S135R, ORF1a:A599V, ORF1a:T708I, ORF1a:T842I, ORF1a:G1307S, ORF1a:I2010V, ORF1a:L3027F, ORF1a:T3090I, ORF1a:L3201F, ORF1a:T3255I, ORF1a:P3395H, ORF1a:D3668Y, ORF1b:P314L, ORF1b:G662S, ORF1b:S959P, ORF1b:R1315C, ORF1b:I1566V, ORF1b:T2163I, ORF3a:T223I, ORF6:D61L, ORF9b:P10S, S:T19I, S: <b>A27S</b> , S:N81R, S:L84F, S:Y91C, S:G142D, S:H146Q, S:Q183E, S:V213E, S:G339H, S:R346T, S:L368I, S:S371F, S:S373P, S:S375F, S:T376A, S:D405N, S:R408S, S:K417N, S:N440K, S:V445P, S:G446S, S:N460K, S:S477N, S:T478K, S:E484A, S:F486S, S:F490S, S:Q498R, S:N501Y, S:Y505H, S:D614G, S:A653V, S:H655Y, S:N679K, S:P681H, S:N764K, S:D796Y, S:Q954H |
| 28        | OQ569689              | <b>XBB.3</b>          | E:T11A, M:Q19E, M:A63T, N:P13L, N:R203K, N:G204R, N:S413R, ORF1a:K47R, ORF1a:G82D, ORF1a:S135R, ORF1a:T842I, ORF1a:G1307S, ORF1a:A2129S, ORF1a:L3027F, ORF1a:T3090I, ORF1a:L3201F, ORF1a:T3255I, ORF1a:P3395H, ORF1b:P314L, ORF1b:G662S, ORF1b:S959P, ORF1b:R1315C, ORF1b:I1566V, ORF1b:I1998V, ORF1b:T2163I, ORF3a:T223I, ORF6:D61L, ORF7a:A105V, ORF9b:P10S, S:T19I, S: <b>A27S</b> , S:G142D, S:H146Q, S:Q183E, S:V213E, S:G339H, S:R346T, S:L368I, S:S371F, S:S373P, S:S375F, S:T376A, S:D405N, S:R408S, S:K417N, S:N440K, S:V445P, S:G446S, S:N460K, S:S477N, S:T478K, S:E484A, S:F486S, S:F490S, S:Q498R, S:N501Y, S:Y505H, S:D614G, S:H655Y, S:N679K, S:P681H, S:N764K, S:D796Y, S:Q954H                                                        |
| 29        | OQ587519              | <b>XBB.3</b>          | E:T11A, M:Q19E, M:A63T, N:P13L, N:R203K, N:G204R, N:S413R, ORF1a:K47R, ORF1a:G82D, ORF1a:S135R, ORF1a:T842I, ORF1a:G1307S, ORF1a:L3027F, ORF1a:T3090I, ORF1a:L3201F, ORF1a:T3255I, ORF1a:P3395H, ORF1b:P314L, ORF1b:G662S, ORF1b:S959P, ORF1b:R1315C, ORF1b:I1566V, ORF1b:I1998V, ORF1b:T2163I, ORF3a:T223I, ORF6:D61L, ORF9b:P10S, S:T19I                                                                                                                                                                                                                                                                                                                                                                                                             |
| 40        | OQ569690              | <b>XBB.3</b>          | E:T11A, M:Q19E, M:A63T, M:H155Y, N:P13L, N:R203K, N:G204R, N:S413R, ORF1a:K47R, ORF1a:G82D, ORF1a:S135R, ORF1a:T842I, ORF1a:G1307S, ORF1a:L3027F, ORF1a:T3090I, ORF1a:L3201F, ORF1a:T3255I, ORF1a:P3395H, ORF1b:P314L, ORF1b:G662S, ORF1b:S959P, ORF1b:R1315C, ORF1b:I1566V, ORF1b:I1998V, ORF1b:T2163I, ORF3a:T223I, ORF6:D61L, ORF9b:P10S, S:T19I, S: <b>A27S</b> , S:G142D, S:H146Q, S:Q183E, S:V213E, S:G339H, S:R346T, S:L368I, S:S371F, S:S373P, S:S375F, S:T376A, S:D405N, S:R408S, S:K417N, S:N440K, S:V445P, S:G446S,                                                                                                                                                                                                                         |



|    |          |              |                                                                                                                                                                                                                                                                                                                                                                                                                                                                                                                                                                                                                                                                     |
|----|----------|--------------|---------------------------------------------------------------------------------------------------------------------------------------------------------------------------------------------------------------------------------------------------------------------------------------------------------------------------------------------------------------------------------------------------------------------------------------------------------------------------------------------------------------------------------------------------------------------------------------------------------------------------------------------------------------------|
|    |          |              | S:N460K, S:S477N, S:T478K, S:E484A, S:F486S, S:F490S, S:Q498R, S:N501Y, S:Y505H, S:D614G, S:H655Y, S:N679K, S:P681H, S:N764K, S:D796Y, S:Q954H                                                                                                                                                                                                                                                                                                                                                                                                                                                                                                                      |
| 41 | OQ587520 | <b>XBB.3</b> | E:T11A, M:Q19E, M:A63T, N:P13L, N:R203K, N:G204R, N:S413R,,ORF1a:K47R, ORF1a:G82D, ORF1a:S135R, ORF1a:T842I, ORF1a:G1307S, ORF1a:L3027F, ORF1a:T3090I, ORF1a:L3201F, ORF1a:T3255I, ORF1a:P3395H, ORF1b:P314L, ORF1b:G662S, ORF1b:S959P, ORF1b:R1315C, ORF1b:I1566V, ORF1b:I1998V, ORF1b:T2163I, ORF3a:T223I, ORF6:D61L, ORF9b:P10S, S:T19I                                                                                                                                                                                                                                                                                                                          |
| 42 | OQ587521 | <b>XBB.3</b> | E:T11A, M:Q19E, M:A63T, N:P13L, ORF1a:K47R, ORF1a:S135R, ORF1a:T842I, ORF1a:G1307S, ORF1a:L3027F, ORF1a:T3090I, ORF1a:L3201F, ORF1a:T3255I, ORF1a:P3395H, ORF1b:P314L, ORF1b:G662S, ORF1b:S959P, ORF1b:R1315C, ORF1b:I1566V, ORF1b:I1998V, ORF1b:T2163I, ORF3a:T223I, ORF6:D61L, ORF9b:P10S, S:T19I, S:A27S, S:V83A, S:F86L, S:G142D                                                                                                                                                                                                                                                                                                                                |
| 43 | OQ587522 | <b>XBB.3</b> | E:T11A,M:Q19E, M:A63T, N:P13L, N:R203K, N:G204R, N:S413R, ORF1a:K47R, ORF1a:G82D, ORF1a:S135R, ORF1a:T842I, ORF1a:G1307S, ORF1a:H2357Y, ORF1a:L3027F, ORF1a:T3090I, ORF1a:L3201F, ORF1a:T3255I, ORF1a:P3395H, ORF1b:P314L, ORF1b:G662S, ORF1b:S959P, ORF1b:R1315C, ORF1b:I1566V, ORF1b:I1998V, ORF1b:T2163I, ORF3a:T223I, ORF6:D61L, ORF9b:P10S, S:T19I                                                                                                                                                                                                                                                                                                             |
| 44 | OQ652066 | <b>XBB.3</b> | E:T11A, M:Q19E, N:P13L, N:A152V, N:S187L, N:R203K, N:G204R, N:S413R, ORF1a:K47R, ORF1a:G82D, ORF1a:S135R, ORF1a:T842I, ORF1a:G1307S, ORF1a:L3027F, ORF1a:T3090I, ORF1a:L3201F, ORF1a:T3255I, ORF1a:P3395H, ORF1b:P314L, ORF1b:G662S, ORF1b:S959P, ORF1b:R1315C, ORF1b:I1566V, ORF1b:I1998V, ORF1b:T2163I, ORF3a:T223I, ORF6:D61L, ORF9b:P10S, S:T19I                                                                                                                                                                                                                                                                                                                |
| 52 | OQ569691 | <b>XBB.1</b> | E:T11A, M:Q19E, M:A63T, N:P13L, N:R36Q, N:R203K, N:G204R, N:S413R, ORF1a:K47R, ORF1a:S135R, ORF1a:T842I, ORF1a:G1307S, ORF1a:L3027F, ORF1a:T3090I, ORF1a:L3201F, ORF1a:T3255I, ORF1a:P3395H, ORF1b:P314L, ORF1b:G662S, ORF1b:S959P, ORF1b:R1315C, ORF1b:I1566V, ORF1b:T2163I, ORF3a:T223I, ORF6:D61L, ORF9b:P10S, ORF9b:D33N, S:T19I, S:A27S, S:G142D, S:Q183E, S:V213E, S:G252V, S:G339H, S:R346T, S:L368I, S:S371F, S:S373P, S:S375F, S:T376A, S:D405N, S:R408S, S:K417N, S:N440K, S:V445P, S:G446S, S:N460K, S:S477N, S:T478K, S:E484A, S:F486S, S:F490S, S:Q498R, S:N501Y, S:Y505H, S:D614G, S:H655Y, S:N679K, S:P681H, S:N764K, S:D796Y, S:Q954H               |
| 59 | OQ587523 | <b>XBB</b>   | E:T11A, M:Q19E, M:A63T, N:P13L, ORF1a:K47R, ORF1a:G82D, ORF1a:S135R, ORF1a:T842I, ORF1a:G1307S, ORF1a:L3027F, ORF1a:T3090I, ORF1a:L3201F, ORF1a:T3255I, ORF1a:P3395H, ORF1b:P314L, ORF1b:G662S, ORF1b:S959P, ORF1b:R1315C, ORF1b:I1566V, ORF1b:T2163I, ORF3a:T223I, ORF6:D61L, ORF9b:P10S, S:T19I                                                                                                                                                                                                                                                                                                                                                                   |
| 60 | OQ569692 | <b>XBB.3</b> | E:T11A, M:Q19E, M:A63T, N:P13L, N:R203K, N:G204R, N:S413R, ORF1a:K47R, ORF1a:G82D, ORF1a:S135R, ORF1a:T842I, ORF1a:G1307S, ORF1a:L3027F, ORF1a:T3090I, ORF1a:L3201F, ORF1a:T3255I, ORF1a:P3395H, ORF1b:P314L, ORF1b:G662S, ORF1b:S959P, ORF1b:R1315C, ORF1b:I1566V, ORF1b:I1998V, ORF1b:T2163I, ORF3a:T223I, ORF6:D61L, ORF9b:P10S, S:T19I, S:A27S, S:G142D, S:H146Q, S:Q183E, S:V213E, S:G339H, S:R346T, S:L368I, S:S371F, S:S373P, S:S375F, S:T376A, S:D405N, S:R408S, S:K417N, S:N440K, S:V445P, S:G446S,S:N460K, S:S477N, S:T478K, S:E484A, S:F486S, S:F490S, S:Q498R, S:N501Y, S:Y505H, S:D614G, S:H655Y, S:N679K, S:P681H, S:N764K, S:D796Y, S:Q954H          |
| 61 | OQ587524 | <b>XBB.5</b> | E:T11A, M:Q19E, M:A63T, N:P13L, N:R203K, N:G204R, N:S413R, ORF1a:K47R, ORF1a:G82D, ORF1a:S135R, ORF1a:T842I, ORF1a:V1104A, ORF1a:G1307S, ORF1a:L3027F, ORF1a:T3090I, ORF1a:L3201F, ORF1a:T3255I, ORF1a:P3395H, ORF1b:P314L, ORF1b:G662S, ORF1b:S959P, ORF1b:R1315C, ORF1b:I1566V, ORF1b:T2163I, ORF3a:T223I, ORF6:D61L, ORF9b:P10S, S:T19I                                                                                                                                                                                                                                                                                                                          |
| 76 | OQ569693 | <b>XBB.3</b> | E:T11A,M:Q19E,M:A63T,N:P13L,N:R203K,N:G204R,N:S413R,ORF1a:K47R,ORF1a:G82D, ORF1a:S135R, ORF1a:T842I, ORF1a:G1307S, ORF1a:L3027F, ORF1a:T3090I, ORF1a:L3201F, ORF1a:T3255I, ORF1a:P3395H, ORF1a:L3606F, ORF1b:P314L, ORF1b:G662S, ORF1b:S959P, ORF1b:R1315C, ORF1b:I1566V, ORF1b:I1998V, ORF1b:T2163I, ORF3a:T223I, ORF6:D61L, , ORF9b:P10S, S:T19I, S:A27S, S:G142D, S:H146Q, S:Q183E, S:V213E, S:G339H, S:R346T, S:L368I, S:S371F, S:S373P, S:S375F, S:T376A, S:D405N, S:R408S, S:K417N, S:N440K, S:V445P, S:G446S, S:N460K, S:S477N, S:T478K, S:E484A, S:F486S, S:F490S, S:Q498R, S:N501Y, S:Y505H, S:D614G, S:H655Y, S:N679K, S:P681H, S:N764K, S:D796Y, S:Q954H |

|     |          |              |                                                                                                                                                                                                                                                                                                                                                                                                                                                                                                                                                                                                                                                                                        |
|-----|----------|--------------|----------------------------------------------------------------------------------------------------------------------------------------------------------------------------------------------------------------------------------------------------------------------------------------------------------------------------------------------------------------------------------------------------------------------------------------------------------------------------------------------------------------------------------------------------------------------------------------------------------------------------------------------------------------------------------------|
| 77  | OQ569694 | <b>XBB.5</b> | E:T11A, M:Q19E, M:A63T, N:P13L, N:R203K, N:G204R, N:S413R, ORF1a:K47R, ORF1a:G82D, ORF1a:S135R, ORF1a:T842I, ORF1a:G1307S, ORF1a:L3027F, ORF1a:T3090I, ORF1a:L3201F, ORF1a:T3255I, ORF1a:P3395H, ORF1b:P314L, ORF1b:G662S, ORF1b:S959P, ORF1b:R1315C, ORF1b:I1566V, ORF1b:T2163I, ORF3a:T223I, ORF6:D61L, ORF9b:P10S, S:T19I, S: <b>A27S</b> , S:G142D, S:H146Q, S:Q183E, S:V213E, S:G339H, S:R346T, S:L368I, S:S371F, S:S373P, S:S375F, S:T376A, S:D405N, S:R408S, S:K417N, S:N440K, S:V445P, S:G446S, S:N460K, S:S477N, S:T478K, S:E484A, S:F486S, S:F490S, S:Q498R, S:N501Y, S:Y505H, S:D614G, S:A653V, S:H655Y, S:N679K, S:P681H, S:N764K, S:D796Y, S:Q954H                        |
| 82  | OQ587525 | <b>XBB.3</b> | E:T11A, M:Q19E, M:A63T, N:P13L, N:R203K, N:G204R, N:S413R, ORF1a:K47R, ORF1a:G82D, ORF1a:S135R, ORF1a:T842I, ORF1a:G1307S, ORF1a:L3027F, ORF1a:T3090I, ORF1a:L3201F, ORF1a:T3255I, ORF1a:P3395H, ORF1b:P314L, ORF1b:G662S, ORF1b:S959P, ORF1b:R1315C, ORF1b:I1566V, ORF1b:I1998V, ORF1b:T2163I, ORF3a:T223I, ORF6:D61L, ORF9b:P10S, S:G142D, S:H146Q, S:Q183E, S:V213E, S:G339H, S:R346T, S:L368I, S:S371F, S:S373P, S:S375F, S:T376A, S:D405N, S:R408S, S:K417N, S:N440K, S:V445P, S:G446S, S:N460K, S:S477N, S:T478K, S:E484A, S:F486S, S:F490S, S:Q498R, S:N501Y, S:Y505H, S:D614G, S:H655Y, S:N679K, S:P681H, S:N764K, S:D796Y, S:Q954H                                            |
| 94  | OQ587526 | <b>XBB.3</b> | E:T11A, M:Q19E, M:A63T, N:P13L, N:R203K, N:G204R, N:S413R, ORF1a:K47R, ORF1a:G82D, ORF1a:S135R, ORF1a:T842I, ORF1a:G1307S, ORF1a:H2357Y, ORF1a:L3027F, ORF1a:T3090I, ORF1a:L3201F, ORF1a:T3255I, ORF1a:P3395H, ORF1b:P314L, ORF1b:G662S, ORF1b:S959P, ORF1b:R1315C, ORF1b:I1566V, ORF1b:I1998V, ORF1b:T2163I, ORF3a:T223I, ORF6:D61L, ORF9b:P10S, S:T19I                                                                                                                                                                                                                                                                                                                               |
| 95  | OQ587527 | <b>XBB.3</b> | E:T11A, M:A63T, N:P13L, N:R203K, N:G204R, N:S413R, ORF1a:K47R, ORF1a:G82D, ORF1a:S135R, ORF1a:T842I, ORF1a:G1307S, ORF1a:T1881I, ORF1a:G2868S, ORF1a:L3027F, ORF1a:T3090I, ORF1a:L3201F, ORF1a:T3255I, ORF1a:P3395H, ORF1b:P314L, ORF1b:G662S, ORF1b:S959P, ORF1b:R1315C, ORF1b:I1566V, ORF1b:I1998V, ORF1b:T2163I, ORF3a:T223I, ORF6:D61L, ORF9b:P10S, S:T19I, S: <b>A27S</b> , S:G339H, S:R346T, S:L368I, S:S371F, S:S373P, S:S375F, S:T376A, S:D405N, S:R408S, S:K417N, S:N440K, S:V445P, S:G446S, S:N460K, S:S477N, S:T478K, S:E484A, S:F486S, S:F490S, S:Q498R, S:N501Y, S:Y505H, S:D614G, S:H655Y, S:N679K, S:P681H, S:N764K, S:D796Y, S:Q954H                                   |
| 111 | OQ587528 | <b>XBB.3</b> | E:T11A, M:Q19E, M:A63T, N:P13L, N:R203K, N:G204R, N:S413R, ORF1a:K47R, ORF1a:R73H, ORF1a:G82D, ORF1a:S135R, ORF1a:G728A, ORF1a:G2284Q, ORF1a:P2287H, ORF1b:P314L, ORF9b:P10S, S:T19I, S: <b>A27S</b> , S:F92N, S:G142D                                                                                                                                                                                                                                                                                                                                                                                                                                                                 |
| 124 | OQ587529 | <b>XBB</b>   | E:T11A, M:Q19E, M:A63T, N:P13L, N:R203K, N:G204R, N:S413R, ORF1a:K47R, ORF1a:G82D, ORF1a:S135R, ORF1a:H374Y, ORF1a:T842I, ORF1a:G1307S, ORF1a:L3027F, ORF1a:T3090I, ORF1a:L3201F, ORF1a:T3255I, ORF1a:P3395H, ORF1b:P314L, ORF1b:G662S, ORF1b:S959P, ORF1b:R1315C, ORF1b:I1566V, ORF1b:T2163I, ORF3a:T223I, ORF6:D61L, ORF9b:P10S, S:T19I                                                                                                                                                                                                                                                                                                                                              |
| 133 | OQ569695 | <b>XBB.3</b> | E:T11A, M:Q19E, M:A63T, N:P13L, N:A152V, N:S187L, N:R203K, N:G204R, N:S413R, ORF1a:K47R, ORF1a:G82D, ORF1a:S135R, ORF1a:T842I, ORF1a:G1307S, ORF1a:L3027F, ORF1a:T3090I, ORF1a:L3201F, ORF1a:T3255I, ORF1a:P3395H, ORF1b:P314L, ORF1b:G662S, ORF1b:S959P, ORF1b:R1315C, ORF1b:I1566V, ORF1b:I1998V, ORF1b:T2163I, ORF3a:T223I, ORF6:D61L, ORF9b:P10S, S:T19I, S: <b>A27S</b> , S:G142D, S:H146Q, S:Q183E, S:V213E, S:G339H, S:R346T, S:L368I, S:S371F, S:S373P, S:S375F, S:T376A, S:D405N, S:R408S, S:K417N, S:N440K, S:V445P, S:G446S, S:N460K, S:S477N, S:T478K, S:E484A, S:F486S, S:F490S, S:Q498R, S:N501Y, S:Y505H, S:D614G, S:H655Y, S:N679K, S:P681H, S:N764K, S:D796Y, S:Q954H |
| 143 | OQ587530 | <b>XBB.3</b> | E:T11A, M:Q19E, M:A63T, N:P13L, N:R203K, N:G204R, N:S413R, ORF1a:K47R, ORF1a:G82D, ORF1a:S135R, ORF1a:T842I, ORF1a:G1307S, ORF1a:L3027F, ORF1a:T3090I, ORF1a:L3201F, ORF1a:T3255I, ORF1a:P3395H, ORF1b:P314L, ORF1b:G662S, ORF1b:S959P, ORF1b:R1315C, ORF1b:I1566V, ORF1b:P1727H, ORF1b:I1998V, ORF1b:T2163I, ORF3a:T223I, ORF6:D61L, ORF9b:P10S, S:T19I                                                                                                                                                                                                                                                                                                                               |
| 144 | OQ587531 | <b>XBB.1</b> | E:T11A, M:Q19E, M:A63T, N:P13L, N:R36Q, N:R203K, N:G204R, N:S413R, ORF1a:K47R, ORF1a:S135R, ORF1a:T842I, ORF1a:G1307S, ORF1a:L3027F, ORF1a:T3090I, ORF1a:L3201F, ORF1a:T3255I, ORF1a:P3395H, ORF1b:P314L, ORF1b:G662S, ORF1b:S959P, ORF1b:R1315C, ORF1b:I1566V, ORF1b:T2163I, ORF3a:T223I, ORF6:D61L, ORF9b:P10S, ORF9b:D33N, S:T19I, S: <b>A27S</b> , S:G142D, S:H146Q, S:Q183E, S:V213E, S:G252V, S:G339H, S:R346T, S:L368I, S:S371F, S:S373P, S:S375F, S:T376A, S:D405N, S:R408S, S:K417N, S:N440K, S:V445P, S:G446S, S:N460K, S:S477N, S:T478K, S:E484A, S:F486S, S:F490S, S:Q498R, S:N501Y, S:Y505H, S:D614G, S:H655Y, S:N679K, S:P681H, S:N764K, S:D796Y, S:Q954H                |

|     |          |              |                                                                                                                                                                                                                                                                                                                                                                                                                                                                                                                                                                                                                                                                                        |
|-----|----------|--------------|----------------------------------------------------------------------------------------------------------------------------------------------------------------------------------------------------------------------------------------------------------------------------------------------------------------------------------------------------------------------------------------------------------------------------------------------------------------------------------------------------------------------------------------------------------------------------------------------------------------------------------------------------------------------------------------|
| 160 | OQ587532 | <b>XBB.3</b> | E:T11A, M:Q19E, M:A63T, N:P13L, N:R203K, N:G204R, N:S413R, ORF1a:K47R, ORF1a:G82D, ORF1a:S135R, ORF1a:T842I, ORF1a:G1307S, ORF1a:L3027F, ORF1a:T3090I, ORF1a:L3201F, ORF1a:T3255I, ORF1a:P3395H, ORF1a:T4174I, ORF1b:P314L, ORF1b:G662S, ORF1b:S959P, ORF1b:R1315C, ORF1b:I1566V, ORF1b:V1760F, ORF1b:I1998V, ORF1b:T2163I, ORF3a:T223I, ORF6:D61L, ORF9b:P10S, S:T19I, S:A27S, S:F92I, S:G142D, S:H146Q, S:Q183E, S:V213E, S:G339H, S:R346T, S:L368I, S:S371F, S:S373P, S:S375F, S:T376A, S:D405N, S:R408S, S:K417N, S:N440K, S:V445P, S:G446S, S:N460K, S:S477N, S:T478K, S:E484A, S:F486S, S:F490S, S:Q498R, S:N501Y, S:D614G, S:H655Y, S:N679K, S:P681H, S:N764K, S:D796Y, S:Q954H |
| 161 | OQ587533 | <b>XBB.3</b> | E:T11A, M:Q19E, M:A63T, N:P13L, N:R203K, N:G204R, N:S413R, ORF1a:K47R, ORF1a:G82D, ORF1a:S135R, ORF1a:P276T, ORF1a:T842I, ORF1a:G1307S, ORF1a:L3027F, ORF1a:T3090I, ORF1a:L3201F, ORF1a:T3255I, ORF1a:P3395H, ORF1b:P314L, ORF1b:G662S, ORF1b:S959P, ORF1b:R1315C, ORF1b:I1566V, ORF1b:I1998V, ORF1b:T2163I, ORF3a:T223I, ORF6:D61L, ORF9b:P10S, S:T19I                                                                                                                                                                                                                                                                                                                                |
| 162 | OQ569696 | <b>XBB.3</b> | E:T11A, M:Q19E, M:A63T, N:P13L, N:R203K, N:G204R, N:S413R, ORF1a:K47R, ORF1a:G82D, ORF1a:S135R, ORF1a:T842I, ORF1a:G1307S, ORF1a:L3027F, ORF1a:T3090I, ORF1a:L3201F, ORF1a:T3255I, ORF1a:P3395H, ORF1b:P314L, ORF1b:G662S, ORF1b:S959P, ORF1b:T981S, ORF1b:R1315C, ORF1b:I1566V, ORF1b:I1998V, ORF1b:T2163I, ORF3a:T223I, ORF6:D61L, ORF9b:P10S, S:T19I, S:A27S, S:G142D, S:H146Q, S:Q183E, S:V213E, S:T323I, S:G339H, S:R346T, S:L368I, S:S371F, S:S373P, S:S375F, S:T376A, S:D405N, S:R408S, S:K417N, S:N440K, S:V445P, S:G446S, S:N460K, S:S477N, S:T478K, S:E484A, S:F486S, S:F490S, S:Q498R, S:N501Y, S:Y505H, S:D614G, S:H655Y, S:N679K, S:P681H, S:N764K, S:D796Y, S:Q954H      |
| 163 | OQ587534 | <b>XBB</b>   | E:T11A, M:Q19E, M:A63T, N:P13L, N:R203K, N:G204R, N:S413R, ORF1a:K47R, ORF1a:G82D, ORF1a:S135R, ORF1a:T842I, ORF1a:G1307S, ORF1a:L3027F, ORF1a:T3090I, ORF1a:L3201F, ORF1a:T3255I, ORF1a:P3395H, ORF1b:P314L, ORF1b:G662S, ORF1b:S959P, ORF1b:R1315C, ORF1b:I1566V, ORF1b:T2163I, ORF3a:T223I, ORF6:D61L, ORF9b:P10S, S:T19I                                                                                                                                                                                                                                                                                                                                                           |
| 174 | OQ569697 | <b>XBB.3</b> | E:T11A, M:Q19E, M:A63T, N:P13L, N:R203K, N:G204R, N:S413R, ORF1a:K47R, ORF1a:G82D, ORF1a:S135R, ORF1a:T842I, ORF1a:G1307S, ORF1a:L3027F, ORF1a:T3090I, ORF1a:L3201F, ORF1a:T3255I, ORF1a:P3395H, ORF1b:P314L, ORF1b:G662S, ORF1b:S959P, ORF1b:R1315C, ORF1b:I1566V, ORF1b:I1998V, ORF1b:K2063N, ORF1b:T2163I, ORF3a:T223I, ORF6:D61L, ORF9b:P10S, S:T19I, S:A27S, S:G142D, S:H146Q, S:Q183E, S:V213E, S:G339H, S:R346T, S:L368I, S:S371F, S:S373P, S:S375F, S:T376A, S:D405N, S:R408S, S:K417N, S:N440K, S:V445P, S:G446S, S:N460K, S:S477N, S:T478K, S:E484A, S:F486S, S:F490S, S:Q498R, S:N501Y, S:Y505H, S:D614G, S:H655Y, S:N679K, S:P681H, S:N764K, S:D796Y, S:Q954H              |
| 177 | OQ587535 | <b>XBB.1</b> | E:T11A, M:Q19E, M:A63T, N:P13L, N:R203K, N:G204R, N:S413R, ORF1a:K47R, ORF1a:S135R, ORF1a:T842I, ORF1a:G1307S, ORF1a:V2866M, ORF1a:L3027F, ORF1a:L3201F, ORF1a:T3255I, ORF1a:P3395H, ORF1b:P314L, ORF1b:G662S, ORF1b:S959P, ORF1b:R1315C, ORF1b:I1566V, ORF1b:T2163I, ORF3a:D210E, ORF3a:T223I, ORF6:D61L, ORF8:G8*, ORF9b:P10S, S:T19I, S:A27S, S:G142D, S:H146Q, S:Q183E, S:V213E, S:G252V, S:G339H, S:L368I, S:S371F, S:S373P, S:S375F, S:T376A, S:D405N, S:R408S, S:K417N, S:N440K, S:V445P, S:G446S, S:N460K                                                                                                                                                                      |
| 178 | OQ587536 | <b>XBB.1</b> | E:T11A, M:Q19E, M:A63T, N:P13L, N:R203K, N:G204R, N:S413R, ORF1a:K47R, ORF1a:M85I, ORF1a:S135R, ORF1a:T842I, ORF1a:G1307S, ORF1a:L3027F, ORF1a:T3090I, ORF1a:L3201F, ORF1a:T3255I, ORF1a:P3395H, ORF1b:P314L, ORF1b:G662S, ORF1b:S959P, ORF1b:R1315C, ORF1b:I1566V, ORF1b:T2163I, ORF3a:T223I, ORF6:D61L, ORF8:G8*, ORF9b:P10S, S:T19I                                                                                                                                                                                                                                                                                                                                                 |
| 179 | OQ569698 | <b>XBB.1</b> | E:T11A, M:Q19E, M:A63T, N:P13L, N:R203K, N:G204R, N:S413R, ORF1a:K47R, ORF1a:M85I, ORF1a:S135R, ORF1a:T842I, ORF1a:G1307S, ORF1a:L3027F, ORF1a:T3090I, ORF1a:L3201F, ORF1a:T3255I, ORF1a:P3395H, ORF1b:P314L, ORF1b:G662S, ORF1b:S959P, ORF1b:R1315C, ORF1b:I1566V, ORF1b:T2163I, ORF3a:T223I, ORF6:D61L, ORF8:G8*, ORF9b:P10S, S:T19I                                                                                                                                                                                                                                                                                                                                                 |
| 180 | OQ587537 | <b>XBB.1</b> | E:T11A, M:Q19E, N:P13L, ORF1a:K47R, ORF1a:S135R, ORF1a:T842I, ORF1a:G1307S, ORF1a:G1819S, ORF1a:S1857P, ORF1a:A2123V, ORF1b:P314L, ORF1b:G662S, ORF1b:S959P, ORF1b:R1315C, ORF1b:I1566V, ORF1b:T2163I, ORF3a:T223I, ORF6:D61L, ORF7a:L30H, ORF8:G8*, ORF9b:I5T, ORF9b:P10S, S:T19I, S:A27S, S:S94A, S:G142D, S:H146Q, S:Q183E, S:V213E, S:G252V, S:G339H, S:R346T, S:L368I, S:S371F, S:S373P, S:S375F, S:T376A, S:D405N, S:R408S, S:K417N, S:N440K, S:V445P, S:G446S, S:N460K, S:S477N, S:T478K, S:P507T, S:D614G, S:H655Y, S:N679K, S:P681H, S:N764K, S:D796Y, S:Q954H                                                                                                                |

|     |          |                |                                                                                                                                                                                                                                                                                                                                                                                                                                                                                                                                                                                                                                                                                                      |
|-----|----------|----------------|------------------------------------------------------------------------------------------------------------------------------------------------------------------------------------------------------------------------------------------------------------------------------------------------------------------------------------------------------------------------------------------------------------------------------------------------------------------------------------------------------------------------------------------------------------------------------------------------------------------------------------------------------------------------------------------------------|
| 181 | OQ587538 | <b>XBB.3</b>   | E:T11A, M:Q19E, M:A63T, N:P13L, N:R203K, N:G204R, N:S413R, ORF1a:K47R, ORF1a:G82D, ORF1a:S135R, ORF1a:T842I, ORF1a:G1307S, ORF1a:L3027F, ORF1a:T3090I, ORF1a:L3201F, ORF1a:T3255I, ORF1a:P3395H, ORF1b:P314L, ORF1b:G575R, ORF1b:G662S, ORF1b:S959P, ORF1b:R1315C, ORF1b:I1566V, ORF1b:I1998V, ORF1b:T2163I, ORF3a:T223I, ORF6:D61L, ORF9b:P10S, S:T19I                                                                                                                                                                                                                                                                                                                                              |
| 182 | OQ587539 | <b>XBB</b>     | E:T11A, M:Q19E, M:A63T, N:P13L, ORF1a:K47R, ORF1a:G82D, ORF1a:S135R, ORF1a:T842I, ORF1a:G1307S, ORF1a:L3027F, ORF1a:L3201F, ORF1a:T3255I, ORF1a:P3395H, ORF1b:P314L, ORF3a:T223I, ORF6:D61L, ORF9b:I5T, ORF9b:P10S, S:T19I, S:A27S, S:F92L, S:A93S, S:S94T, S:G142D, S:H146Q, S:D614G, S:H655Y, S:N679K, S:P681H, S:N764K, S:D796Y, S:Q954H                                                                                                                                                                                                                                                                                                                                                          |
| 183 | OQ652056 | <b>XBB</b>     | E:T11A, N:P13L, N:M101*, ORF1b:P314L, ORF1b:G662S, ORF1b:S959P, ORF1b:R1315C, ORF1b:I1566V, ORF1b:T2163I, ORF3a:T223I, ORF9b:P10S, ORF9b:K97N, ORF9b:*98R, S:T19I, S:A27S, S:R408S, S:K417N, S:N440K, S:V445P                                                                                                                                                                                                                                                                                                                                                                                                                                                                                        |
| 184 | OQ569699 | <b>XBB.1</b>   | E:T11A, M:Q19E, M:A63T, N:P13L, N:R203K, N:G204R, N:S413R, ORF1a:K47R, ORF1a:S135R, ORF1a:T842I, ORF1a:G1307S, ORF1a:G1819S, ORF1a:L3027F, ORF1a:T3090I, ORF1a:L3201F, ORF1a:T3255I, ORF1a:P3395H, ORF1b:P314L, ORF1b:G662S, ORF1b:S959P, ORF1b:R1315C, ORF1b:I1566V, ORF1b:T2163I, ORF3a:T223I, ORF6:D61L, ORF8:G8*, ORF9b:I5T, ORF9b:P10S, S:T19I, S:A27S, S:G142D, S:H146Q, S:Q183E, S:V213E, S:G252V, S:G339H, S:R346T, S:L368I, S:S371F, S:S373P, S:S375F, S:T376A, S:D405N, S:R408S, S:K417N, S:N440K, S:V445P, S:G446S, S:N460K, S:S477N, S:T478K, S:E484A, S:F486S, S:F490S, S:Q498R, S:N501Y, S:Y505H, S:D614G, S:H655Y, S:N679K, S:P681H, S:N764K, S:D796Y, S:Q954H                        |
| 185 | OQ569700 | <b>XBB.1.9</b> | E:T11A, M:Q19E, M:A63T, N:P13L, N:R203K, N:G204R, N:S413R, ORF1a:K47R, ORF1a:S135R, ORF1a:T842I, ORF1a:G1307S, ORF1a:G1819S, ORF1a:Y2141H, ORF1a:L3027F, ORF1a:T3090I, ORF1a:L3201F, ORF1a:T3255I, ORF1a:P3395H, ORF1b:P314L, ORF1b:G662S, ORF1b:S959P, ORF1b:R1315C, ORF1b:I1566V, ORF1b:T2163I, ORF3a:T223I, ORF6:D61L, ORF8:G8*, ORF9b:I5T, ORF9b:P10S, S:T19I, S:A27S, S:G142D, S:H146Q, S:Q183E, S:V213E, S:G252V, S:G339H, S:R346T, S:L368I, S:S371F, S:S373P, S:S375F, S:T376A, S:D405N, S:R408S, S:K417N, S:N440K, S:V445P, S:G446S, S:N460K, S:S477N, S:T478K, S:E484A, S:F486S, S:F490S, S:Q498R, S:N501Y, S:Y505H, S:D614G, S:H655Y, S:N679K, S:P681H, S:N764K, S:D796Y, S:Q954H          |
| 186 | OQ569701 | <b>XBB.1.9</b> | E:T11A, M:Q19E, M:A63T, N:P13L, N:R203K, N:G204R, N:S413R, ORF1a:K47R, ORF1a:S135R, ORF1a:T842I, ORF1a:G1307S, ORF1a:G1819S, ORF1a:Y2141H, ORF1a:L3027F, ORF1a:T3090I, ORF1a:L3201F, ORF1a:T3255I, ORF1a:P3395H, ORF1b:P314L, ORF1b:G662S, ORF1b:S959P, ORF1b:R1315C, ORF1b:I1566V, ORF1b:T2163I, ORF3a:T223I, ORF6:D61L, ORF8:G8*, ORF9b:I5T, ORF9b:P10S, S:T19I, S:A27S, S:G142D, S:H146Q, S:Q183E, S:V213E, S:G252V, S:G339H, S:R346T, S:L368I, S:S371F, S:S373P, S:S375F, S:T376A, S:D405N, S:R408S, S:K417N, S:N440K, S:V445P, S:G446S, S:N460K, S:S477N, S:T478K, S:E484A, S:F486S, S:F490S, S:Q498R, S:N501Y, S:Y505H, S:D614G, S:H655Y, S:N679K, S:P681H, S:N764K, S:D796Y, S:Q954H          |
| 187 | OQ569702 | <b>XBB.1.9</b> | E:T11A, M:Q19E, M:A63T, N:P13L, N:R203K, N:G204R, N:G238S, N:S413R, ORF1a:K47R, ORF1a:S135R, ORF1a:T842I, ORF1a:G1307S, ORF1a:G1819S, ORF1a:Y2141H, ORF1a:L3027F, ORF1a:T3090I, ORF1a:L3201F, ORF1a:T3255I, ORF1a:P3395H, ORF1b:P314L, ORF1b:G662S, ORF1b:S959P, ORF1b:R1315C, ORF1b:I1566V, ORF1b:T2163I, ORF3a:T223I, ORF6:D61L, ORF8:G8*, ORF9b:I5T, ORF9b:P10S, S:T19I, S:A27S, S:G142D, S:H146Q, S:Q183E, S:V213E, S:G252V, S:G339H, S:R346T, S:L368I, S:S371F, S:S373P, S:S375F, S:T376A, S:D405N, S:R408S, S:K417N, S:N440K, S:V445P, S:G446S, S:N460K, S:S477N, S:T478K, S:E484A, S:F486S, S:F490S, S:Q498R, S:N501Y, S:Y505H, S:D614G, S:H655Y, S:N679K, S:P681H, S:N764K, S:D796Y, S:Q954H |
| 188 | OQ587540 | <b>XBB.1</b>   | E:T11A, M:Q19E, M:A63T, N:P13L, ORF1a:K47R, ORF1a:S135R, ORF1a:T842I, ORF1a:G1307S, ORF1b:P314L, ORF1b:G662S, ORF1b:S959P, ORF1b:R1315C, ORF1b:I1566V, ORF1b:T2163I, ORF3a:K198N, ORF3a:T223I, ORF6:D61L, ORF8:G8*, ORF9b:P10S, ORF9b:E65D, S:T19I                                                                                                                                                                                                                                                                                                                                                                                                                                                   |
| 189 | OQ569703 | <b>XBB.1</b>   | E:T11A, M:Q19E, M:A63T, N:P13L, N:R203K, N:G204R, N:S413R, ORF1a:K47R, ORF1a:S135R, ORF1a:T842I, ORF1a:G1307S, ORF1a:G1819S, ORF1a:L3027F, ORF1a:T3090I, ORF1a:L3201F, ORF1a:T3255I, ORF1a:P3395H, ORF1b:P314L, ORF1b:G662S, ORF1b:S959P, ORF1b:R1315C, ORF1b:I1566V, ORF1b:T2163I, ORF3a:T223I, ORF6:D61L, ORF8:G8*, ORF9b:I5T, ORF9b:P10S, S:T19I, S:A27S, S:G142D, S:H146Q, S:Q183E, S:V213E, S:G252V, S:G339H, S:R346T, S:L368I, S:S371F, S:S373P, S:S375F, S:T376A, S:D405N, S:R408S, S:K417N, S:N440K, S:V445P, S:G446S, S:N460K, S:S477N, S:T478K, S:E484A, S:F486S, S:F490S, S:Q498R, S:N501Y, S:D614G, S:H655Y, S:N679K, S:P681H, S:N764K, S:D796Y, S:Q954H                                 |

|     |          |              |                                                                                                                                                                                                                                                                                                                                                                                                                                                                                                                                                                                                                                                                                                                                         |
|-----|----------|--------------|-----------------------------------------------------------------------------------------------------------------------------------------------------------------------------------------------------------------------------------------------------------------------------------------------------------------------------------------------------------------------------------------------------------------------------------------------------------------------------------------------------------------------------------------------------------------------------------------------------------------------------------------------------------------------------------------------------------------------------------------|
| 190 | OQ587541 | <b>XBB.2</b> | E:T11A, M:Q19E, M:A63T, M:I73V, N:P13L, N:R203K, N:G204R, N:S413R, ORF1a:K47R, ORF1a:S135R, ORF1a:T842I, ORF1a:G1307S, ORF1a:T1637I, ORF1a:L3027F, ORF1a:T3090I, ORF1a:L3201F, ORF1a:T3255I, ORF1a:P3395H, ORF1b:P314L, ORF1b:G662S, ORF1b:S959P, ORF1b:R1315C, ORF1b:I1566V, ORF1b:T2163I, ORF3a:T223I, ORF6:D61L, ORF8:S54P, ORF9b:P10S, S:T19I, S:A27S, S:G142D, S:H146Q, S:Q183E, S:V213E, S:D253G, S:G339H, S:R346T, S:L368I, S:S371F, S:S373P, S:S375F, S:T376A, S:D405N, S:R408S, S:K417N, S:N440K, S:V445P, S:G446S, S:N460K, S:S477N, S:T478K, S:E484A, S:F486S, S:F490S, S:Q498R, S:N501Y, S:D614G, S:H655Y, S:N679K, S:P681H, S:N764K, S:D796Y, S:Q954H                                                                      |
| 191 | OQ569704 | <b>XBB.1</b> | E:T11A, M:Q19E, M:A63T, N:P13L, N:R36Q, N:R203K, N:G204R, N:S413R, ORF1a:K47R, ORF1a:H81R, ORF1a:S135R, ORF1a:T842I, ORF1a:G1307S, ORF1a:K1720R, ORF1a:T1881I, ORF1a:L3027F, ORF1a:T3090I, ORF1a:L3201F, ORF1a:T3255I, ORF1a:P3395H, ORF1b:P314L, ORF1b:G662S, ORF1b:S959P, ORF1b:R1315C, ORF1b:I1566V, ORF1b:T2163I, ORF3a:T223I, ORF6:D61L, ORF9b:P10S, ORF9b:D33N, S:T19I, S:A27S, S:D88K, S:G89W, S:V90G, S:G142D, S:H146Q, S:Q183E, S:V213E, S:G252V, S:G339H, S:R346T, S:L368I, S:S371F, S:S373P, S:S375F, S:T376A, S:D405N, S:R408S, S:K417N, S:N440K, S:V445P, S:G446S, S:N460K, S:S477N, S:T478K, S:E484A, S:F486S, S:F490S, S:Q498R, S:N501Y, S:D614G, S:A647S, S:H655Y, S:N679K, S:P681H, S:N764K, S:D796Y, S:Q954H, S:N969K |
| 192 | OQ652057 | <b>XBB.1</b> | E:T11A, M:Q19E, N:P13L, N:R203K, N:G204R, N:S413R, ORF1a:K47R, ORF1a:S135R, ORF1a:T842I, ORF1a:G1307S, ORF1a:L3027F, ORF1a:T3090I, ORF1a:L3201F, ORF1a:T3255I, ORF1a:P3395H, ORF1b:P314L, ORF1b:G662S, ORF1b:S959P, ORF1b:R1315C, ORF1b:I1566V, ORF1b:T2163I, ORF3a:T223I, ORF6:D61L, ORF8:G8*, ORF9b:P10S, ORF9b:T60I, S:T19I, S:F43R                                                                                                                                                                                                                                                                                                                                                                                                  |
| 193 | OQ569705 | <b>XBB.2</b> | E:T11A, M:Q19E, M:A63T, N:P13L, N:R203K, N:G204R, N:S413R, ORF1a:K47R, ORF1a:S135R, ORF1a:T842I, ORF1a:G1307S, ORF1a:L3027F, ORF1a:T3090I, ORF1a:L3201F, ORF1a:T3255I, ORF1a:P3395H, ORF1a:I3779V, ORF1b:P314L, ORF1b:G662S, ORF1b:S959P, ORF1b:R1315C, ORF1b:I1566V, ORF1b:T2163I, ORF3a:T223I, ORF6:D61L, ORF9b:P10S, S:T19I, S:A27S, S:A67S, S:G142D, S:H146Q, S:Q183E, S:V213E, S:D253G, S:G339H, S:R346T, S:L368I, S:S371F, S:S373P, S:S375F, S:T376A, S:D405N, S:R408S, S:K417N, S:N440K, S:V445P, S:G446S, S:N460K, S:S477N, S:T478K, S:E484A, S:F486S, S:F490S, S:Q498R, S:N501Y, S:P521Q, S:D614G, S:H655Y, S:N679K, S:P681H, S:N764K, S:D796Y, S:Q954H                                                                        |
| 194 | OQ569706 | <b>XBB.1</b> | E:T11A, M:Q19E, M:A63T, N:P13L, N:R203K, N:G204R, N:S413R, ORF1a:K47R, ORF1a:S135R, ORF1a:A540V, ORF1a:T842I, ORF1a:G1307S, ORF1a:L3027F, ORF1a:T3090I, ORF1a:L3201F, ORF1a:T3255I, ORF1a:P3395H, ORF1b:P314L, ORF1b:G662S, ORF1b:S959P, ORF1b:R1315C, ORF1b:I1566V, ORF1b:T2163I, ORF3a:T223I, ORF6:D61L, ORF8:G8*, ORF9b:P10S, S:T19I, S:A27S, S:G142D, S:H146Q, S:Q183E, S:V213E, S:G252V, S:G339H, S:R346T, S:L368I, S:S371F, S:S373P, S:S375F, S:T376A, S:D405N, S:R408S, S:K417N, S:N440K, S:V445P, S:G446S, S:N460K, S:S477N, S:T478K, S:E484A, S:F486S, S:F490S, S:Q498R, S:N501Y, S:D614G, S:H655Y, S:N679K, S:P681H, S:N764K, S:D796Y, S:Q954H, S:N969K                                                                       |
| 195 | OQ587542 | <b>XBB.1</b> | E:T11A, M:Q19E, M:A63T, N:P13L, N:R203K, N:G204R, N:A252S, N:P368L, N:S413R, ORF1a:K47R, ORF1a:R99H, ORF1a:S135R, ORF1a:F651L, ORF1a:T842I, ORF1a:L1110F, ORF1a:G1307S, ORF1a:A2379V, ORF1a:L3027F, ORF1a:T3090I, ORF1a:L3201F, ORF1a:T3255I, ORF1a:P3395H, ORF1b:P314L, ORF1b:G662S, ORF1b:S959P, ORF1b:R1315C, ORF1b:I1566V, ORF1b:T2163I, ORF3a:T24I, ORF3a:T223I, ORF6:D61L, ORF9b:P10S, S:T19I                                                                                                                                                                                                                                                                                                                                     |
| 196 | OQ652149 | <b>XBB.3</b> | E:T11A, M:Q19E, M:A63T, N:P13L, N:R203K, N:G204R, N:S413R, ORF1a:K47R, ORF1a:G82D, ORF1a:S135R, ORF1a:T842I, ORF1a:G1307S, ORF1a:L3027F, ORF1a:T3090I, ORF1a:L3201F, ORF1a:T3255I, ORF1a:P3395H, ORF1b:P314L, ORF1b:G662S, ORF1b:S959P, ORF1b:R1315C, ORF1b:I1566V, ORF1b:I1998V, ORF1b:T2163I, ORF3a:T223I, ORF6:D61L, ORF9b:P10S, S:T19I, S:A27S, S:F86I, S:G142D, S:H146Q, S:Q183E, S:V213E, S:G339H, S:R346T, S:L368I, S:S371F, S:S373P, S:S375F, S:T376A, S:D405N, S:R408S, S:K417N, S:N440K, S:V445P, S:G446S, S:N460K, S:S477N, S:T478K, S:E484A, S:F486S, S:F490S, S:Q498R, S:D614G, S:H655Y, S:N679K, S:P681H, S:N764K, S:D796Y, S:Q954H                                                                                       |

|     |          |              |                                                                                                                                                                                                                                                                                                                                                                                                                                                                                                                                                                                                                                                                          |
|-----|----------|--------------|--------------------------------------------------------------------------------------------------------------------------------------------------------------------------------------------------------------------------------------------------------------------------------------------------------------------------------------------------------------------------------------------------------------------------------------------------------------------------------------------------------------------------------------------------------------------------------------------------------------------------------------------------------------------------|
| 197 | OQ587543 | <b>XBB.3</b> | E:T11A, M:Q19E, M:A63T, N:P13L, N:R203K, N:G204R, N:S413R, ORF1a:K47R, ORF1a:G82D, ORF1a:S135R, ORF1a:T842I, ORF1a:G1307S, ORF1a:G2545S, ORF1a:L3027F, ORF1a:T3090I, ORF1a:L3201F, ORF1a:T3255I, ORF1a:P3395H, ORF1b:P314L, ORF1b:G662S, ORF1b:S959P, ORF1b:R1315C, ORF1b:I1566V, ORF1b:I1998V, ORF1b:T2163I, ORF3a:T223I, ORF6:D61L, ORF9b:P10S, S:T19I                                                                                                                                                                                                                                                                                                                 |
| 198 | OQ569707 | <b>XBB.3</b> | E:T11A, M:Q19E, M:A63T, N:P13L, N:R203K, N:G204R, N:S413R, ORF1a:K47R, ORF1a:G82D, ORF1a:S135R, ORF1a:T842I, ORF1a:G1307S, ORF1a:L3027F, ORF1a:T3090I, ORF1a:L3201F, ORF1a:T3255I, ORF1a:P3395H, ORF1b:P314L, ORF1b:G662S, ORF1b:S959P, ORF1b:R1315C, ORF1b:I1566V, ORF1b:I1998V, ORF1b:T2163I, ORF3a:T223I, ORF6:D61L, ORF9b:P10S, S:T19I, S:A27S, S:G142D, S:H146Q, S:Q183E, S:V213E, S:G339H, S:R346T, S:L368I, S:S371F, S:S373P, S:S375F, S:T376A, S:D405N, S:R408S, S:K417N, S:N440K, S:V445P, S:G446S, S:N460K, S:S477N, S:T478K, S:E484A, S:F486S, S:F490S, S:Q498R, S:N501Y, S:D614G, S:H655Y, S:N679K, S:P681H, S:N764K, S:D796Y, S:Q954H                       |
| 199 | OQ587544 | <b>XBB.1</b> | E:T11A, M:Q19E, M:A63T, N:P13L, N:R203K, N:G204R, N:S413R, ORF1a:K47R, ORF1a:S135R, ORF1a:D144Y, ORF1a:T842I, ORF1a:G1307S, ORF1a:L3027F, ORF1a:T3090I, ORF1a:L3201F, ORF1a:T3255I, ORF1a:P3395H, ORF1b:P314L, ORF1b:G662S, ORF1b:S959P, ORF1b:R1315C, ORF1b:I1566V, ORF1b:T2163I, ORF3a:T223I, ORF6:D61L, ORF9b:P10S, S:T19I, S:A27S, S:D614G, S:H655Y, S:N679K, S:P681H, S:N764K, S:D796Y, S:Q954H                                                                                                                                                                                                                                                                     |
| 200 | OQ587545 | <b>XBB.2</b> | E:T11A, M:Q19E, M:A63T, N:P13L, ORF1a:K47R, ORF1a:S135R, ORF1a:T842I, ORF1a:G1307S, ORF1a:A2909S, ORF1a:L3027F, ORF1a:T3090I, ORF1a:L3201F, ORF1a:T3255I, ORF1a:P3395H, ORF1b:P314L, ORF1b:G662S, ORF1b:S959P, ORF1b:R1315C, ORF1b:I1566V, ORF1b:T2163I, ORF3a:T24I, ORF3a:D155Y, ORF3a:T223I, ORF6:D61L, ORF9b:P10S, S:T19I                                                                                                                                                                                                                                                                                                                                             |
| 201 | OQ587546 | <b>XBB.3</b> | E:T11A, M:Q19E, M:A63T, N:P13L, N:A90S, N:R203K, N:G204R, N:S413R, ORF1a:R24H, ORF1a:K47R, ORF1a:G82D, ORF1a:S135R, ORF1a:T842I, ORF1a:G1307S, ORF1a:S2911T, ORF1a:L3027F, ORF1a:T3090I, ORF1a:L3201F, ORF1a:T3255I, ORF1a:P3395H, ORF1a:T4355I, ORF1b:P314L, ORF1b:G662S, ORF1b:S959P, ORF1b:R1315C, ORF1b:I1566V, ORF1b:I1998V, ORF1b:T2163I, ORF3a:T223I, ORF6:D61L, ORF9b:P10S, ORF9b:E86D, S:T19I                                                                                                                                                                                                                                                                   |
| 202 | OQ587547 | <b>XBB.1</b> | E:T11A, M:Q19E, M:A63T, N:P13L, N:R203K, N:G204R, N:S413R, ORF1a:K47R, ORF1a:S135R, ORF1a:T842I, ORF1a:G1307S, ORF1a:G1819S, ORF1a:L3027F, ORF1a:L3201F, ORF1a:T3255I, ORF1a:P3395H, ORF1a:T4175I, ORF1b:P314L, ORF1b:G662S, ORF1b:S959P, ORF1b:R1315C, ORF1b:I1566V, ORF1b:T2163I, ORF3a:T223I, ORF6:D61L, ORF8:G8*, ORF9b:I5T, ORF9b:P10S, S:T19I, S:A27S, S:D614G, S:H655Y, S:N679K, S:P681H, S:N764K, S:D796Y, S:Q954H                                                                                                                                                                                                                                               |
| 203 | OQ587548 | <b>XBB.3</b> | E:T11A, M:Q19E, M:A63T, N:P13L, N:R203K, N:G204R, N:S413R, ORF1a:K47R, ORF1a:G82D, ORF1a:S135R, ORF1a:T842I, ORF1a:G1307S, ORF1a:L3027F, ORF1a:T3090I, ORF1a:L3201F, ORF1a:T3255I, ORF1a:P3395H, ORF1b:P314L, ORF1b:G662S, ORF1b:S959P, ORF1b:R1315C, ORF1b:I1566V, ORF1b:T2163I, ORF3a:T223I, ORF6:D61L, ORF9b:P10S, S:T19I, S:A27S, S:G142D, S:H146Q, S:Q183E, S:V213E, S:G339H, S:R346T, S:L368I, S:S371F, S:S373P, S:S375F, S:T376A, S:D405N, S:R408S, S:K417N, S:N440K, S:V445P, S:G446S, S:N460K, S:S477N, S:T478K, S:E484A, S:F486S                                                                                                                               |
| 204 | OQ569708 | <b>XBB.3</b> | E:T11A, M:Q19E, M:A63T, N:P13L, N:R203K, N:G204R, N:S413R, ORF1a:K47R, ORF1a:G82D, ORF1a:S135R, ORF1a:T842I, ORF1a:G1307S, ORF1a:S1952L, ORF1a:L3027F, ORF1a:T3090I, ORF1a:L3201F, ORF1a:T3255I, ORF1a:P3395H, ORF1b:P314L, ORF1b:G662S, ORF1b:S959P, ORF1b:R1315C, ORF1b:I1566V, ORF1b:I1998V, ORF1b:T2163I, ORF3a:T223I, ORF6:D61L, ORF9b:P10S, S:T19I, S:A27S, S:F86L, S:G142D, S:H146Q, S:Q183E, S:V213E, S:G339H, S:R346T, S:L368I, S:S371F, S:S373P, S:S375F, S:T376A, S:D405N, S:R408S, S:K417N, S:N440K, S:V445P, S:G446S, S:N460K, S:S477N, S:T478K, S:E484A, S:F486S, S:F490S, S:Q498R, S:N501Y, S:D614G, S:H655Y, S:N679K, S:P681H, S:N764K, S:D796Y, S:Q954H |
| 205 | OQ587549 | <b>XBB.5</b> | E:T11A, M:Q19E, M:A63T, N:P13L, N:R203K, N:G204R, N:S413R, ORF1a:K47R, ORF1a:G82D, ORF1a:S135R, ORF1a:R550C, ORF1a:T842I, ORF1a:G1307S, ORF1a:L3027F, ORF1a:T3090I, ORF1a:L3201F, ORF1a:T3255I, ORF1a:P3395H, ORF1b:P314L, ORF1b:G662S, ORF1b:S959P, ORF1b:R1315C, ORF1b:I1566V, ORF1b:T2163I, ORF3a:T223I, ORF6:D61L, ORF9b:P10S, S:T19I                                                                                                                                                                                                                                                                                                                                |
| 206 | OQ587550 | <b>XBB.5</b> | E:T11A, M:Q19E, M:A63T, N:P13L, N:R203K, N:G204R, N:S413R, ORF1a:K47R, ORF1a:G82D, ORF1a:S135R, ORF1a:T842I, ORF1a:G1307S, ORF1a:L3027F, ORF1a:T3090I, ORF1a:L3201F, ORF1a:T3255I, ORF1a:P3395H, ORF1b:P314L, ORF1b:G662S, ORF1b:S959P, ORF1b:R1315C,                                                                                                                                                                                                                                                                                                                                                                                                                    |

|     |          |                |                                                                                                                                                                                                                                                                                                                                                                                                                                                                                                                                                                                                                                                              |
|-----|----------|----------------|--------------------------------------------------------------------------------------------------------------------------------------------------------------------------------------------------------------------------------------------------------------------------------------------------------------------------------------------------------------------------------------------------------------------------------------------------------------------------------------------------------------------------------------------------------------------------------------------------------------------------------------------------------------|
|     |          |                | ORF1b:I1566V, ORF1b:T2163I, ORF3a:T223I, ORF6:D61L, ORF9b:P10S, S:T19I, S:A27S, S:G142D, S:H146Q, S:Q183E, S:V213E, S:G339H, S:R346T, S:L368I, S:S371F, S:S373P, S:S375F, S:T376A, S:D405N, S:R408S, S:K417N, S:N440K, S:V445P, S:G446S, S:N460K                                                                                                                                                                                                                                                                                                                                                                                                             |
| 207 | OQ587551 | <b>XBB.3</b>   | E:T11A, M:Q19, M:A63T, N:P13L, N:R203K, N:G204R, N:S413R, ORF1a:K47R, ORF1a:G82D, ORF1a:S135R, ORF1a:T842I, ORF1a:G1307S, ORF1a:L3027F, ORF1a:T3090I, ORF1a:L3201F, ORF1a:T3255I, ORF1a:P3395H, ORF1b:P314L, ORF1b:G662S, ORF1b:S959P, ORF1b:R1315C, ORF1b:I1566V, ORF1b:I1998V, ORF1b:T2163I, ORF3a:T223I, ORF6:D61L, ORF9b:P10S, S:T19I, S:A27S                                                                                                                                                                                                                                                                                                            |
| 208 | OQ587552 | <b>XBB.1.5</b> | E:T11A, M:Q19E, M:A63T, N:P13L, N:R203K, N:G204R, N:S413R, ORF1a:K47R, ORF1a:S135R, ORF1a:T842I, ORF1a:G1307S, ORF1a:L3027F, ORF1a:L3201F, ORF1a:T3255I, ORF1a:P3395H, ORF1b:P314L, ORF1b:G662S, ORF1b:S959P, ORF1b:R1315C, ORF1b:I1566V, ORF1b:T2163I, ORF3a:T223I, ORF6:D61L, ORF8:G8*, ORF9b:P10S, S:T19I, S:A27S, S:D614G, S:H655Y, S:N679K, S:P681H, S:N764K, S:D796Y, S:Q954H                                                                                                                                                                                                                                                                          |
| 209 | OQ587553 | <b>XBB.1.5</b> | E:T11A, M:Q19E, M:A63T, N:P13L, N:R203K, N:G204R, N:S413R, ORF1a:K47R, ORF1a:S135R, ORF1a:T842I, ORF1a:G1307S, ORF1a:L3027F, ORF1a:T3090I, ORF1a:L3201F, ORF1a:T3255I, ORF1a:P3395H, ORF1b:P314L, ORF1b:G662S, ORF1b:S959P, ORF1b:R1315C, ORF1b:I1566V, ORF1b:T2163I, ORF3a:T223I, ORF6:D61L, ORF8:G8*, ORF9b:P10S, S:T19I                                                                                                                                                                                                                                                                                                                                   |
| 210 | OQ652067 | <b>XBB.1</b>   | E:T11A, M:Q19E, M:A63T, N:P13L, N:R203K, N:G204R, N:S413R, ORF1a:K47R, ORF1a:S135R, ORF1a:G353C, ORF1a:T842I, ORF1a:G1307S, ORF1a:L3027F, ORF1a:E3073K, ORF1a:C3093V, ORF1a:T3095N, ORF1a:L3829F, ORF1b:P314L, ORF1b:G662S, ORF1b:S959P, ORF1b:R1315C, ORF1b:I1566V, ORF1b:D1746Y, ORF1b:T2163I, ORF3a:T223I, ORF6:D61L, ORF8:G8*, ORF9b:P10S, ORF9b:N55S, S:T19I, S:A27S, S:G142D, S:H146Q, S:Q183E, S:V213E, S:G252V, S:G339H, S:L368I, S:S371F, S:S373P, S:S375F, S:T376A, S:D405N, S:R408S, S:K417N, S:N440K, S:V445P, S:G446S, S:N460K, S:T478K, S:Q498R, S:N501Y, S:Y505H, S:D614G, S:H655Y, S:N679K, S:P681H, S:N764K, S:D796Y, S:Q954H               |
| 211 | OQ569709 | <b>XBB.1.5</b> | E:T11A, M:Q19E, M:A63T, N:P13L, N:R203K, N:G204R, N:S413R, ORF1a:K47R, ORF1a:S135R, ORF1a:T842I, ORF1a:G1307S, ORF1a:L3027F, ORF1a:T3090I, ORF1a:L3201F, ORF1a:T3255I, ORF1a:P3395H, ORF1b:P314L, ORF1b:G662S, ORF1b:S959P, ORF1b:R1315C, ORF1b:I1566V, ORF1b:T2163I, ORF3a:T223I, ORF6:D61L, ORF8:G8*, ORF9b:P10S, S:T19I, S:A27S, S:G142D, S:H146Q, S:Q183E, S:V213E, S:G252V, S:G339H, S:F347C, S:L368I, S:S371F, S:S373P, S:S375F, S:T376A, S:D405N, S:R408S, S:K417N, S:N440K, S:V445P, S:G446S, S:N460K, S:T478K, S:E484A, S:F486P, S:F490S, S:Q498, S:N501Y, S:D614G, S:H655Y, S:N679K, S:P681H, S:N764K, S:D796Y, S:Q954H                            |
| 212 | OQ587554 | <b>XBB.1</b>   | E:T11A, M:Q19E, M:A63T, N:P13L, N:R203K, N:G204R, N:S413R, ORF1a:K47R, ORF1a:S135R, ORF1a:T842I, ORF1a:G1307S, ORF1a:L3027F, ORF1a:T3090I, ORF1a:L3201F, ORF1a:T3255I, ORF1a:P3371S, ORF1a:P3395H, ORF1b:P314L, ORF1b:G662S, ORF1b:A869V, ORF1b:S959P, ORF1b:R1315C, ORF1b:I1566V, ORF1b:T2163I, ORF3a:T223I, ORF6:D61L, ORF8:G8*, ORF9b:P10S, S:T19I                                                                                                                                                                                                                                                                                                        |
| 213 | OQ587555 | <b>XBB.1.5</b> | E:T11A, M:Q19E, M:A63T, N:P13L, N:R203K, N:G204R, N:S413R, ORF1a:K47R, ORF1a:S135R, ORF1a:T842I, ORF1a:G1307S, ORF1a:L3027F, ORF1a:T3090I, ORF1a:L3201F, ORF1a:T3255I, ORF1a:P3395H, ORF1b:P314L, ORF1b:G662S, ORF1b:S959P, ORF1b:R1315C, ORF1b:I1566V, ORF1b:T2163I, ORF3a:T223I, ORF6:D61L, ORF8:G8*, ORF9b:P10S, S:T19I, S:A27S, S:N87D, S:G142D, S:H146Q, S:Q183E, S:V213E, S:G252V, S:G339H, S:R346T, S:L368I, S:S371F, S:S373P, S:S375F, S:T376A, S:D405N, S:R408S, S:K417N, S:N440K, S:V445P, S:G446S, S:N460K, S:S477N, S:T478K, S:E484A, S:F486P, S:F490S, S:Q498R, S:N501Y, S:D614G, S:H655Y, S:N679K, S:P681H, S:N764K, S:D796Y, S:Q954H, S:N969K |
| 214 | OQ587556 | <b>XBB</b>     | E:T11A, M:Q19E, M:A63T, N:P13L, N:R203K, N:G204R, N:S413R, ORF1a:K47R, ORF1a:G82D, ORF1a:S135R, ORF1a:T842I, ORF1a:G1307S, ORF1a:L3027F, ORF1a:T3090I, ORF1a:L3201F, ORF1a:T3255I, ORF1a:P3395H, ORF1b:P314L, ORF1b:G662S, ORF1b:S959P, ORF1b:R1315C, ORF1b:I1566V, ORF1b:T2163I, ORF3a:T223I, ORF6:D61L, ORF9b:P10S, S:T19I, S:A27S, S:G142D, S:H146Q, S:Q183E, S:V213E, S:G339H, S:R346T, S:L368I, S:S371F, S:S373P, S:S375F, S:T376A, S:D405N, S:R408S, S:K417N, S:N440K, S:V445P, S:G446S, S:N460K, S:S477N, S:T478K, S:E484A, S:F486S                                                                                                                   |
| 215 | OQ587557 | <b>XBB.1</b>   | E:T11A, M:Q19E, M:A63T, N:P13L, N:R203K, N:G204R, N:S413R, ORF1a:K47R, ORF1a:S135R, ORF1a:T842I, ORF1a:G1307S, ORF1a:L3027F, ORF1a:L3201F, ORF1a:T3255I, ORF1a:P3395H, ORF1b:P314L, ORF1b:G662S, ORF1b:S959P, ORF1b:R1315C, ORF1b:I1566V, ORF1b:T2163I, ORF3a:T223I, ORF6:D61L, ORF8:G8*, ORF9b:P10S, S:T19I, S:A27S, S:G142D, S:H146Q, S:Q183E, S:V213E, S:G252V, S:G339H, S:R346T, S:L368I, S:S371F, S:S373P, S:S375F, S:T376A, S:D405N, S:R408S, S:K417N, S:N440K, S:V445P, S:G446S                                                                                                                                                                       |

|     |          |                |                                                                                                                                                                                                                                                                                                                                                                                                                                                                                                                                                                                                                                                                                     |
|-----|----------|----------------|-------------------------------------------------------------------------------------------------------------------------------------------------------------------------------------------------------------------------------------------------------------------------------------------------------------------------------------------------------------------------------------------------------------------------------------------------------------------------------------------------------------------------------------------------------------------------------------------------------------------------------------------------------------------------------------|
| 216 | OQ652150 | <b>XBB.1</b>   | E:T11A, M:Q19E, M:A63T, N:P13L, N:R203K, N:G204R, N:S413R, ORF1a:K47R, ORF1a:S135R, ORF1a:T842I, ORF1a:L1130F, ORF1a:G1307S, ORF1a:L3027F, ORF1a:T3090I, ORF1a:L3201F, ORF1a:T3255I, ORF1a:P3395H, ORF1b:P314L, ORF1b:G662S, ORF1b:S959P, ORF1b:R1315C, ORF1b:I1566V, ORF1b:T2163I, ORF3a:T223I, ORF6:D61L, ORF9b:P10S, S:T19I, S:A27S, S:G142D, S:H146Q, S:Q183E, S:V213E, S:G252V, S:G339H, S:R346T, S:L368I, S:S371F, S:S373P, S:S375F, S:T376A, S:D405N, S:R408S, S:K417N, S:N440K, S:V445P, S:G446S, S:N460K, S:S477N, S:T478K, S:E484A, S:F486S, S:F490S, S:Q498R, S:N501Y, S:D614G, S:H655Y, S:N679K, S:P681H, S:N764K, S:D796Y, S:Q954H                                     |
| 217 | OQ587558 | <b>XBB.3</b>   | E:T11A, M:Q19E, M:A63T, N:P13L, N:R203K, N:G204R, N:S413R, ORF1a:K47R, ORF1a:G82D, ORF1a:S135R, ORF1a:T842I, ORF1a:G1307S, ORF1a:D1440G, ORF1a:K1529N, ORF1a:L3027F, ORF1a:T3090I, ORF1a:L3201F, ORF1a:T3255I, ORF1a:P3395H, ORF1b:T250I, ORF1b:P314L, ORF1b:G662S, ORF1b:S959P, ORF1b:R1315C, ORF1b:I1566V, ORF1b:I1998V, ORF1b:T2163I, ORF3a:T223I, ORF6:D61L, ORF9b:P10S, S:T19I                                                                                                                                                                                                                                                                                                 |
| 218 | OQ652151 | <b>XBB.2</b>   | E:T11A, M:Q19E, M:A63T, N:P13L, N:R203K, N:G204R, N:S413R, ORF1a:K47R, ORF1a:S135R, ORF1a:T842I, ORF1a:G1307S, ORF1a:L3027F, ORF1a:T3090I, ORF1a:L3201F, ORF1a:T3255I, ORF1a:P3395H, ORF1a:I3779V, ORF1b:P314L, ORF1b:G662S, ORF1b:S959P, ORF1b:R1315C, ORF1b:I1566V, ORF1b:T2163I, ORF3a:T223I, ORF6:D61L, ORF9b:P10S, S:A27S, S:A67S, S:G142D, S:H146Q, S:Q183E, S:V213E, S:D253G, S:G339H, S:R346T, S:L368I, S:S371F, S:S373P, S:S375F, S:T376A, S:D405N, S:R408S, S:K417N, S:N440K, S:V445P, S:G446S, S:N460K, S:S477N, S:T478K, S:E484A, S:F486S, S:F490S, S:Q498R, S:N501Y, S:P521Q, S:D614G, S:H655Y, S:N679K, S:P681H, S:N764K, S:D796Y, S:Q954H                            |
| 219 | OQ652069 | <b>XBB.1.5</b> | E:T11A, M:Q19E, N:P13L, ORF1a:K47R, ORF1a:S135R, ORF1a:T842I, ORF1a:G1307S, ORF1a:L3027F, ORF1b:P314L, ORF3a:L73P, ORF3a:T223I, ORF6:D61L, ORF8:G8*, ORF9b:P10S, S:T19I, S:A27S, S:G339H, S:L368I, S:S371F, S:S373P, S:S375F, S:T376A, S:D405N, S:R408S, S:K417N, S:N440K, S:V445P, S:G446S                                                                                                                                                                                                                                                                                                                                                                                         |
| 220 | OQ652070 | <b>XBB.2</b>   | N:R203K, N:G204R, ORF1a:K47R, ORF1a:S135R, ORF1a:D203N, ORF1a:Y799I, ORF1a:T842I, ORF1a:G1307S, ORF1a:L3201F, ORF1a:T3255I, ORF1a:P3395H, ORF1b:P314L, ORF3a:T223I, ORF6:D61L, ORF9b:P10S, ORF9b:E65G, S:T19I, S:G142D, S:H146Q, S:Q183E, S:V213E, S:D253G                                                                                                                                                                                                                                                                                                                                                                                                                          |
| 221 | OQ569710 | <b>XBB.2</b>   | E:T11A, M:Q19E, M:A63T, N:P13L, N:R203K, N:G204R, N:S413R, ORF1a:K47R, ORF1a:S135R, ORF1a:T842I, ORF1a:G1307S, ORF1a:L3027F, ORF1a:T3090I, ORF1a:L3201F, ORF1a:T3255I, ORF1a:P3395H, ORF1b:P314L, ORF1b:G662S, ORF1b:S959P, ORF1b:R1315C, ORF1b:I1566V, ORF1b:T2163I, ORF1b:A2222V, ORF3a:T223I, ORF6:D61L, ORF9b:P10S, S:T19I, S:A27S, S:G142D, S:H146Q, S:Q183E, S:V213E, S:D253G, S:G339H, S:R346T, S:L368I, S:S371F, S:S373P, S:S375F, S:T376A, S:D405N, S:R408S, S:K417N, S:N440K, S:V445P, S:G446S, S:N460K, S:S477N, S:T478K, S:E484A, S:F486S, S:F490S, S:Q498R, S:N501Y, S:Y505H, S:Q613H, S:D614G, S:H655Y, S:N679K, S:P681H, S:N764K, S:D796Y, S:Q954H                   |
| 222 | OQ587559 | <b>XBB.1.2</b> | E:T11A, M:Q19E, M:A63T, N:P13L, N:R203K, N:G204R, N:S413R, ORF1a:K47R, ORF1a:S135R, ORF1a:T842I, ORF1a:G950S, ORF1a:G1307S, ORF1a:L3027F, ORF1a:T3090I, ORF1a:L3201F, ORF1a:T3255I, ORF1a:P3395H, ORF1b:P314L, ORF1b:G662S, ORF1b:S959P, ORF1b:T1050N, ORF1b:R1315C, ORF1b:I1566V, ORF1b:T2163I, ORF3a:T223I, ORF6:D61L, ORF8:G8*, ORF9b:P10S, S:T19I                                                                                                                                                                                                                                                                                                                               |
| 223 | OQ587560 | <b>XBB.2</b>   | E:T11A, M:Q19E, M:A63T, N:P13L, N:R203K, N:G204R, N:S413R, ORF1a:K47R, ORF1a:S135R, ORF1a:T842I, ORF1a:G1307S, ORF1a:P1977L, ORF1a:L3027F, ORF1a:T3090I, ORF1a:L3201F, ORF1a:T3255I, ORF1a:P3395H, ORF1b:P314L, ORF1b:G662S, ORF1b:S959P, ORF1b:R1315I, ORF1b:I1566V, ORF1b:T2163I, ORF3a:T223I, ORF6:D61L, ORF9b:P10S, S:T19I, S:A27S, S:A67S, S:G142D, S:H146Q, S:Q183E, S:V213E, S:D253G, S:G339H, S:R346T, S:L368I, S:S371F, S:S373P, S:S375F, S:T376A, S:D405N, S:R408S, S:K417, S:N440, S:V445P, S:G446S, S:N460K, S:S477N, S:T478K, S:E484A, S:F486S, S:F490S, S:Q498R, S:N501Y, S:P521Q, S:D614G, S:H655Y, S:N679K, S:P681H, S:N764K, S:D796Y, S:Q954H                      |
| 224 | OQ652152 | <b>XBB.1.2</b> | E:T11A, M:Q19E, M:A63T, N:P13L, N:R203K, N:G204R, N:S413R, ORF1a:K47R, ORF1a:S135R, ORF1a:T842I, ORF1a:G1307S, ORF1a:T1678N, ORF1a:L3027F, ORF1a:T3090I, ORF1a:L3201F, ORF1a:T3255I, ORF1a:P3395H, ORF1b:P314L, ORF1b:G662S, ORF1b:S959P, ORF1b:R1315C, ORF1b:I1566V, ORF1b:Y1648C, ORF1b:T2163I, ORF3a:T223I, ORF6:D61L, ORF8:G8*, ORF9b:P10S, ORF9b:A22V, S:T19I, S:A27S, S:G142D, S:H146Q, S:Q183E, S:V213E, S:G252V, S:G339H, S:R346T, S:L368I, S:S371F, S:S373P, S:S375F, S:T376A, S:D405N, S:R408S, S:K417N, S:N440K, S:V445P, S:G446S, S:N460K, S:S477N, S:T478K, S:E484A, S:F486S, S:F490S, S:Q498R, S:N501Y, S:D614G, S:H655Y, S:N679K, S:P681H, S:N764K, S:D796Y, S:Q954H |
| 225 | OQ569711 | <b>XBB.1.2</b> | E:T11A, M:Q19E, M:A63T, N:P13L, N:R203K, N:G204R, N:S413R, ORF1a:K47R, ORF1a:S135R, ORF1a:T842I, ORF1a:G1307S, ORF1a:T1678N, ORF1a:L3027F, ORF1a:T3090I, ORF1a:L3201F, ORF1a:T3255I, ORF1a:P3395H, ORF1b:P314L, ORF1b:G662S, ORF1b:S959P, ORF1b:R1315C, ORF1b:I1566V, ORF1b:Y1648C, ORF1b:T2163I, ORF3a:T223I, ORF6:D61L, ORF8:G8*, ORF9b:P10S, ORF9b:A22V, S:T19I, S:A27S, S:G142D,                                                                                                                                                                                                                                                                                                |



|     |          |                  |                                                                                                                                                                                                                                                                                                                                                                                                                                                                                                                                                                                                                                                                                                 |
|-----|----------|------------------|-------------------------------------------------------------------------------------------------------------------------------------------------------------------------------------------------------------------------------------------------------------------------------------------------------------------------------------------------------------------------------------------------------------------------------------------------------------------------------------------------------------------------------------------------------------------------------------------------------------------------------------------------------------------------------------------------|
|     |          |                  | S:H146Q, S:Q183E, S:V213E, S:G252V, S:G339H, S:R346T, S:L368I, S:S371F, S:S373P, S:S375F, S:T376A, S:D405N, S:R408S, S:K417N, S:N440K, S:V445P, S:G446S, S:N460K, S:S477N, S:T478K, S:E484A, S:F486S, S:F490S, S:Q498R, S:N501Y, S:D614G, S:H655Y, S:N679K, S:P681H, S:N764K, S:D796Y, S:Q954H                                                                                                                                                                                                                                                                                                                                                                                                  |
| 226 | OQ587561 | <b>XBB.1</b>     | E:T11A, M:Q19E, M:A63T, N:P13L, N:R203K, N:G204R, N:S413R, ORF1a:K47R, ORF1a:S135R, ORF1a:T842I, ORF1a:G1307S, ORF1a:G1705S, ORF1a:T2087I, ORF1a:L3027F, ORF1a:L3201F, ORF1a:T3255I, ORF1a:P3395H, ORF1a:A4357V, ORF1b:P314L, ORF1b:G662S, ORF1b:S959P, ORF1b:R1315C, ORF1b:I1566V, ORF1b:T2163I, ORF3a:T223I, ORF6:D61L, ORF8:G8*, ORF9b:P10S, S:T19I                                                                                                                                                                                                                                                                                                                                          |
| 227 | OQ587562 | <b>XBB.1</b>     | E:T11A, M:Q19E, M:A63T, N:P13L, N:R203K, N:G204R, N:S413R, ORF1a:K47R, ORF1a:S135R, ORF1a:T842I, ORF1a:G1307S, ORF1a:L3027F, ORF1a:T3090I, ORF1a:L3201F, ORF1a:T3255I, ORF1a:P3395H, ORF1b:P314L, ORF1b:G662S, ORF1b:S959P, ORF1b:R1315C, ORF1b:I1566V, ORF1b:K1828Q, ORF1b:T2163I, ORF3a:T223I, ORF6:D61L, ORF8:G8*, ORF9b:P10S, S:T19I, S:A27S, S:G142D, S:H146Q, S:Q183E, S:V213E, S:G252V, S:G339H, S:R346T, S:L368I, S:S371F, S:S373P, S:S375F, S:T376A, S:D405N, S:R408S, S:K417N, S:N440K, S:V445P, S:G446S, S:N460K, S:S477N, S:T478K, S:E484A, S:F486S, S:F490S, S:Q498R, S:N501Y, S:Y505H, S:D614G, S:H655Y, S:N679K, S:P681H, SN764K, S:D796Y, S:Q954H                               |
| 228 | OQ587563 | <b>XBB.1</b>     | E:T11A, M:Q19E, M:A63T, N:P13L, N:R203K, N:G204R, N:S413R, ORF1a:K47R, ORF1a:S135R, ORF1a:T842I, ORF1a:G1307S, ORF1a:P2287S, ORF1a:L3027F, ORF1a:T3090I, ORF1a:L3201F, ORF1a:T3255I, ORF1a:P3395H, ORF1b:P314L, ORF1b:G662S, ORF1b:S959P, ORF1b:R1315C, ORF1b:I1566, ORF1b:T2163I, ORF3a:T223I, ORF6:D61L, ORF7a:A8V, ORF9b:P10S, S:T19I                                                                                                                                                                                                                                                                                                                                                        |
| 229 | OQ587564 | <b>XBB.1</b>     | E:T11A, M:Q19E, M:A63T, N:P13L, N:R203K, N:G204R, N:S413R, ORF1a:K47R, ORF1a:P80L, ORF1a:S135R, ORF1a:T842I, ORF1a:G1307S, ORF1a:L3027F, ORF1a:T3090I, ORF1a:L3201F, ORF1a:T3255I, ORF1a:P3395H, ORF1b:P314L, ORF1b:G662S, ORF1b:S959P, ORF1b:R1315C, ORF1b:I1566V, ORF1b:T2163I, ORF3a:T223I, ORF6:D61L, ORF8:G8*, ORF9b:P10S, S:T19I, S:A27S                                                                                                                                                                                                                                                                                                                                                  |
| 230 | OQ587565 | <b>XBB</b>       | E:T11A, M:Q19E, N:P13L, N:G129S, N:R203K, N:G204R, N:S413R, ORF1a:K47R, ORF1a:G82D, ORF1a:S135R, ORF1a:T842I, ORF1a:G1307S, ORF1a:V1915I, ORF1a:L2367I, ORF1a:L3027F, ORF1a:T3090I, ORF1a:L3201F, ORF1a:T3255I, ORF1a:P3395H, ORF1b:P314L, ORF1b:G662S, ORF1b:S959P, ORF1b:E1264D, ORF1b:R1315C, ORF1b:I1566V, ORF1b:T2163I, ORF3a:T223I, ORF6:D61L, ORF9b:P10S, S:T19I, S:A27S, S:S31F, S:V62L, S:G142D, S:H146Q, S:Q183E, S:V213E, S:G339H, S:R346T, S:L368I, S:S371F, S:S373P, S:S375F, S:T376A, S:D405N, S:R408S, S:K417N, S:N440K, S:V445P, S:G446S, S:N460K, S:S477N, S:T478K, S:E484A, S:F486P, S:F490S, S:Q498R, S:N501Y, S:D614G, S:H655Y, S:N679K, S:P681H, S:N764K, S:D796Y, S:Q954H |
| 231 | OQ587566 | <b>XBB.1.9.1</b> | E:T11A, M:Q19E, M:A63T, N:P13L, N:R203K, N:G204R, N:S413R, ORF1a:K47R, ORF1a:S135R, ORF1a:C657Y, ORF1a:T842I, ORF1a:G1307S, ORF1a:G1819S, ORF1a:L3027F, ORF1a:T3090I, ORF1a:L3201F, ORF1a:T3255I, ORF1a:P3395H, ORF1a:T4175I, ORF1b:P314L, ORF1b:G662S, ORF1b:S959P, ORF1b:R1315C, ORF1b:I1566V, ORF1b:T2163I, ORF3a:T223I, ORF6:D61L, ORF8:G8*, ORF9b:I5T, ORF9b:P10S, S:T19I                                                                                                                                                                                                                                                                                                                  |
| 232 | OQ569712 | <b>XBB.2</b>     | E:T11A, M:Q19E, M:A63T, N:P13L, N:R203K, N:G204R, N:S413R, ORF1a:K47R, ORF1a:S135R, ORF1a:T842I, ORF1a:G1307S, ORF1a:G2091S, ORF1a:L3027F, ORF1a:T3090I, ORF1a:L3201F, ORF1a:T3255I, ORF1a:P3395H, ORF1b:P314L, ORF1b:G662S, ORF1b:R1315C, ORF1b:I1566V, ORF1b:T2163I, ORF3a:T223I, ORF6:D61L, ORF7a:A13V, ORF9b:P10S, S:T19I, S:A27S, S:G142D, S:H146Q, S:Q183E, S:V213E, S:D253G, S:G339H, S:R346T, S:L368I, S:S371F, S:S373P, S:S375F, S:T376A, S:D405N, S:R408S, S:K417N, S:N440K, S:V445P, S:G446S, S:N460K, S:S477N, S:T478K, S:E484A, S:F486P, S:F490S, S:Q498R, S:N501Y, S:Y505H, S:P521S, S:D614G, S:H655Y, S:N679K, S:P681H, S:N764K, S:D796Y, S:Q954H                                |
| 233 | OQ587567 | <b>XBB.2</b>     | E:T11A, M:Q19E, M:A63T, N:P13L, N:A50V, N:R203K, N:G204R, N:S413R, ORF1a:K47R, ORF1a:S135R, ORF1a:T842I, ORF1a:G1307S, ORF1a:L3027F, ORF1a:T3090I, ORF1a:L3201F, ORF1a:T3255I, ORF1a:P3395H, ORF1b:P314L, ORF1b:G662S, ORF1b:S959P, ORF1b:R1315C, ORF1b:I1566V, ORF1b:T2163I, ORF3a:T223I, ORF6:D61L, ORF9b:P10S, ORF9b:R47C, S:T19I, S:A27S                                                                                                                                                                                                                                                                                                                                                    |
| 234 | OQ587568 | <b>XBB.1.9</b>   | E:T11A, M:Q19E, M:A63T, N:P13L, N:R203K, N:G204R, N:S413R, ORF1a:E36D, ORF1a:K47R, ORF1a:S135R, ORF1a:T842I, ORF1a:N1262D, ORF1a:G1307S, ORF1a:G1819S, ORF1a:P2134S, ORF1a:L3027F, ORF1a:L3201F, ORF1a:T3255I, ORF1a:P3395H, ORF1a:T4175I, ORF1b:P314L, ORF1b:G662S, ORF1b:S959P, ORF1b:R1315C, ORF1b:I1322V, ORF1b:S1408A, ORF1b:I1566V, ORF1b:T2163I, ORF3a:T223I, ORF6:D61L, ORF8:G8*, ORF9b:I5T, ORF9b:P10S, S:T19I, S:A27S, S:D614G, S:H655Y, S:N679K, S:P681H, S:N764K, S:D796Y, S:Q954H                                                                                                                                                                                                  |
| 235 | OQ569713 | <b>XBB.1</b>     | E:T11A, M:Q19E, M:A63T, N:P13L, N:R203K, N:G204R, N:S413R, ORF1a:K47R, ORF1a:S135R, ORF1a:T842I, ORF1a:G1307S, ORF1a:L3027F, ORF1a:T3090I, ORF1a:L3201F, ORF1a:T3255I, ORF1a:P3371S, ORF1a:P3395H, ORF1b:P314L, ORF1b:G662S, ORF1b:S959P, ORF1b:R1315C,                                                                                                                                                                                                                                                                                                                                                                                                                                         |

|     |          |                |                                                                                                                                                                                                                                                                                                                                                                                                                                                                                                                                                                                                                                                                                    |
|-----|----------|----------------|------------------------------------------------------------------------------------------------------------------------------------------------------------------------------------------------------------------------------------------------------------------------------------------------------------------------------------------------------------------------------------------------------------------------------------------------------------------------------------------------------------------------------------------------------------------------------------------------------------------------------------------------------------------------------------|
|     |          |                | ORF1b:I1566V, ORF1b:T2163I, ORF3a:T223I, ORF6:D61L, ORF8:G8*, ORF9b:P10S, S:T19I, S:A27S, S:G142D, S:H146Q, S:Q183E, S:V213E, S:G252V, S:G339H, S:R346T, S:L368I, S:S371F, S:S375F, S:T376A, S:D405N, S:R408S, S:K417N, S:N440K, S:V445P, S:G446S, S:N460K, S:S477N, S:T478K, S:E484A, S:F486S, S:F490S, S:Q498R, S:N501Y, S:Y505H, S:D614G, S:H655Y, S:N679K, S:P681H, S:N764K, S:D796Y, S:Q954H                                                                                                                                                                                                                                                                                  |
| 236 | OQ652153 | <b>XBB.1.2</b> | E:T11A, M:Q19E, M:A63T, N:P13L, N:R203K, N:G204R, N:S413R, ORF1a:K47R, ORF1a:S135R, ORF1a:T842I, ORF1a:G1307S, ORF1a:T1678N, ORF1a:L3027F, ORF1a:T3090I, ORF1a:L3201F, ORF1a:T3255I, ORF1a:P3395H, ORF1b:P314L, ORF1b:G662S, ORF1b:S959P, ORF1b:R1315C, ORF1b:I1566V, ORF1b:Y1648C, ORF1b:T2163I, ORF3a:T223I, ORF6:D61L, ORF8:G8*, ORF9b:P10S, ORF9b:A22V, S:T19I, S:A27S, S:G142D, S:H146Q, S:Q183E, S:V213E, S:G252V, S:G339H, S:R346T, S:L368I, S:S371F, S:S373P, S:S375F, S:T376A, S:D405N, SR408S, S:K417N, S:N440K, S:V445P, S:G446S, S:N460K, S:S477N, S:T478K, S:E484A, S:F486S, S:F490S, S:Q498R, S:N501Y, S:D614G, S:H655Y, S:N679K, S:P681H, S:N764K, S:D796Y, S:Q954H |
| 237 | OQ569714 | <b>XBB.1.5</b> | E:T11A, M:Q19E, M:A63T, N:P13L, N:R203K, N:G204R, N:S413R, ORF1a:K47R, ORF1a:S135R, ORF1a:T842I, ORF1a:G1307S, ORF1a:T2300I, ORF1a:L3027F, ORF1a:T3090I, ORF1a:L3201F, ORF1a:T3255I, ORF1a:P3395H, ORF1b:P218L, ORF1b:P314L, ORF1b:G662S, ORF1b:S959P, ORF1b:R1315C, ORF1b:I1566V, ORF1b:T2163I, ORF3a:T223I, ORF6:D61L, ORF8:G8*, ORF9b:P10S, S:T19I, S:A27S, S:G142D, S:H146Q, S:Q183E, S:V213E, S:G252V, S:G339H, S:R346T, S:L368I, S:S371F, S:S373P, S:S375F, S:T376A, S:D405N, S:R408S, S:K417N, S:N440K, S:V445P, S:G446S, S:N460K, S:S477N, S:T478K, S:E484A, S:F486P, S:F490S, S:Q498R, S:N501Y, S:Y505H, S:D614G, S:H655Y, S:N679K, S:P681H, S:N764K, S:D796Y, S:Q954H    |
| 238 | OQ587569 | <b>XBB.1.5</b> | E:T11A, M:Q19E, M:A63T, N:P13L, N:R203K, N:G204R, N:S413R, ORF1a:K47R, ORF1a:S135R, ORF1a:T842I, ORF1a:G1307S, ORF1a:T2300I, ORF1a:L3027F, ORF1a:T3090, ORF1a:L3201F, ORF1a:T3255, ORF1a:P3395H, ORF1b:P218L, ORF1b:P314L, ORF1b:G662S, ORF1b:S959P, ORF1b:R1315C, ORF1b:I1566V, ORF1b:T2163I, ORF3a:T223I, ORF6:D61L, ORF8:G8*, ORF9b:P10S, S:T19I, S:A27S                                                                                                                                                                                                                                                                                                                        |
| 239 | OQ569715 | <b>XBB.1</b>   | E:T11A, M:Q19E, M:A63T, N:P13L, N:R203K, N:G204R, N:S413R, ORF1a:K47R, ORF1a:S135R, ORF1a:T842I, ORF1a:G1307S, ORF1a:L3027F, ORF1a:T3090I, ORF1a:L3201F, ORF1a:T3255I, ORF1a:P3395H, ORF1b:P314L, ORF1b:G662S, ORF1b:S959P, ORF1b:R1315C, ORF1b:I1566V, ORF1b:T2163I, ORF3a:W45R, ORF3a:T223I, ORF6:D61L, ORF8:G8*, ORF9b:P10S, S:T19I, S:A27S, S:G142D, S:H146Q, S:Q183E, S:V213E, S:G252V, S:G339H, S:R346T, S:L368I, S:S371F, S:S373P, S:S375F, S:T376A, S:D405N, S:R408S, S:K417N, S:N440K, S:V445P, S:G446S, S:N460K, S:S477N, S:T478K, S:E484A, S:F486S, S:F490S, S:Q498R, S:N501Y, S:D614G, S:H655Y, S:N679K, S:P681H, S:T747I, S:N764K, S:D796Y, S:Q954H                   |
| 240 | OQ587570 | <b>XBB.1</b>   | E:T11A, M:Q19E, N:P13L, N:S78N, N:R203K, N:G204R, N:S413R, ORF1a:K47R, ORF1a:L92F, ORF1a:S135R, ORF1a:T842I, ORF1a:G1307S, ORF1a:P2287S, ORF1a:L3027F, ORF1a:T3090I, ORF1a:L3201F, ORF1a:T3255I, ORF1a:P3395H, ORF1b:P314L, ORF1b:G662S, ORF1b:S959P, ORF1b:R1315C, ORF1b:I1566V, ORF1b:T2163I, ORF3a:T223I, ORF6:D61L, ORF9b:P10S, ORF9b:A75T, S:T19I                                                                                                                                                                                                                                                                                                                             |
| 241 | OQ587571 | <b>XBB.1.9</b> | E:T11A, M:Q19E, M:A63T, N:P13L, N:R203K, N:G204R, N:T362IN:S413R, ORF1a:K47R, ORF1a:S135R, ORF1a:T842I, ORF1a:P971L, ORF1a:G1307S, ORF1a:G1819S, ORF1a:L3027F, ORF1a:L3201F, ORF1a:T3255I, ORF1a:P3395H, ORF1a:T4175I, ORF1b:P314L, ORF1b:G662S, ORF1b:S959P, ORF1b:R1315C, ORF1b:Q1546H, ORF1b:I1566V, ORF1b:T2163I, ORF3a:T223I, ORF6:D61L, ORF8:G8*, ORF9b:I5T, ORF9b:P10S, S:T19I, S:A27S, S:K77T, S:G142D, S:H146Q, S:Q183E, S:V213E, S:G252V, S:R346T, S:L368I, S:S371F, S:S373P, S:S375F, S:T376A, S:D405N, S:R408S, S:K417N, S:N440K, S:V445P, S:G446S, S:N460K                                                                                                            |
| 242 | OQ587572 | <b>XBB.1</b>   | E:T11A, M:Q19E, M:A63T, N:P13L, N:R203K, N:G204R, N:S413R, ORF1a:K47R, ORF1a:P80L, ORF1a:S135R, ORF1a:T842I, ORF1a:G1307S, ORF1a:L3027F, ORF1a:T3090I, ORF1a:L3201F, ORF1a:T3255I, ORF1a:P3395H, ORF1b:P314L, ORF1b:G662S, ORF1b:S959P, ORF1b:R1315C, ORF1b:I1566V, ORF1b:T2163I, ORF3a:T223I, ORF6:D61L, ORF8:G8*, ORF9b:P10S, S:T19I, S:A27S, S:G142D, S:H146Q, S:Q183E, S:V213E, S:G252V, S:G339H, S:R346T, S:L368I, S:S371F, S:S373P, S:S375F, S:T376A, S:D405N, S:R408S, S:K417N, S:N440K, S:V445P, S:G446S, S:N460K, S:S477N, S:T478K, S:E484A, S:F486S, S:F490S, S:Q498R, S:N501Y, S:D614G, S:H655Y, S:N679K, S:P681H, S:N764K, S:D796Y, S:Q954H                            |

|     |          |                  |                                                                                                                                                                                                                                                                                                                                                                                                                                                                                                                                                                                                                                          |
|-----|----------|------------------|------------------------------------------------------------------------------------------------------------------------------------------------------------------------------------------------------------------------------------------------------------------------------------------------------------------------------------------------------------------------------------------------------------------------------------------------------------------------------------------------------------------------------------------------------------------------------------------------------------------------------------------|
| 243 | OQ587573 | <b>XBB.1.5</b>   | E:T11A, N:P13L, N:R203K, N:G204RN:S413R, ORF1a:K47R, ORF1a:S135R, ORF1a:T842I, ORF1a:G1307S, ORF1a:I2790T, ORF1a:L3027F, ORF1a:T3090I, ORF1a:L3201F, ORF1a:T3255I, ORF1a:P3395H, ORF1b:P314L, ORF1b:G662S, ORF1b:S959P, ORF1b:R1315C, ORF1b:I1566V, ORF1b:T2163I, ORF3a:I118T, ORF3a:T223I, ORF6:D61L, ORF8:G8*, ORF9b:P10S, S:T19I                                                                                                                                                                                                                                                                                                      |
| 244 | OQ587574 | <b>XBB.1.9.1</b> | E:T11A, M:Q19E, M:A63T, N:P13L, N:R203K, N:G204R, N:T362IN:S413R, ORF1a:K47R, ORF1a:S135R, ORF1a:T842I, ORF1a:P971L, ORF1a:G1307S, ORF1a:G1819S, ORF1b:P314L, ORF1b:G662S, ORF1b:S959P, ORF1b:R1315C, ORF1b:Q1546H, ORF1b:I1566V, ORF1b:T2163I, ORF3a:T223I, ORF6:D61L, ORF8:G8*, ORF9b:I5T, ORF9b:P10S, S:T19I, S:A27S, S:Y91H, S:G142D, S:H146Q, S:Q183E, S:V213E, S:G252V, S:G339H, S:L368I, S:S371F, S:S373P, S:S375F, S:T376A, S:D405N, S:R408S, S:K417N, S:N440K, S:V445P, S:G446S, S:N460K, S:S477N, S:T478K, S:E484A, S:F486P, S:F490S, S:Q498R, S:N501Y, S:Y505H, S:D614G, S:H655Y, S:N679K, S:P681H, S:N764K, S:D796Y, S:Q954H |

**Supplementary Table 7: Univariate binary regression analysis**

| <b>A) Asymptomatic</b>        |                            |                |
|-------------------------------|----------------------------|----------------|
| <b>Characteristics</b>        | <b>Odds ratio (95% CI)</b> | <b>p value</b> |
| Age (5)                       | 0.986 (0.910 – 1.067)      | 0.720          |
| Gender, male                  | 1.58 (0.816 – 3.044)       | 0.176          |
| Ct value                      | 0.102 (0.939 – 1.152)      | 0.453          |
| History of COVID-19           | 0.586 (0.231 – 1.489)      | 0.261          |
| Vaccination (Yes)             | 1.280 (0.531 – 3.088)      | 0.582          |
| AZD1222                       | 1.143 (0.457 – 2.858)      | 0.775          |
| BBV152                        | 1.475 (0.496 – 4.384)      | 0.485          |
| BNT162b/mRNA-1273             | 2.388 (0.495 – 11.52)      | 0.278          |
| No. of doses                  | 1.041 (0.753 – 1.441)      | 0.806          |
| Vaccination prior to COVID-19 | 1.534 (0.606 – 3.886)      | 0.367          |
| Underlying conditions (Yes)   | 0.728 (0.373 – 1.420)      | 0.352          |
| Metabolic syndrome            | 1.390 (0.547 – 3.536)      | 0.489          |
| Pregnancy                     | 0.429 (0.163 – 1.124)      | 0.085          |
| No. of underlying conditions  | 1.135 (0.750 – 1.720)      | 0.549          |
| XBB.1                         | 2.348 (0.141 – 39.171)     | 0.552          |
| XBB.2                         | 0.783 (0.046 – 13.391)     | 0.866          |
| XBB.3                         | 1.971 (0.196 – 19.776)     | 0.564          |
| XBB.5                         | 7.645 (0 – 22.345)         | 0.999          |
| <b>B) Mild</b>                |                            |                |
| <b>Characteristics</b>        | <b>Odds ratio (95% CI)</b> | <b>p value</b> |
| Age (5)                       | 0.964 (0.906 – 1.025)      | 0.244          |
| Gender, male                  | 0.815 (0.490 – 1.356)      | 0.431          |
| Ct value                      | 0.971 (0.896 – 1.053)      | 0.477          |
| History of COVID-19           | 0.566 (0.29 – 1.104)       | 0.095          |
| Vaccination (Yes)             | 3.211 (1.640 – 6.286)      | 0.001***       |
| AZD1222                       | 3.021 (1.507 – 6.055)      | 0.002**        |
| BBV152                        | 4.327 (1.777 – 10.534)     | 0.001***       |
| BNT162b/mRNA-1273             | 1.875 (0.472 – 7.454)      | 0.372          |

|                               |                        |          |
|-------------------------------|------------------------|----------|
| No. of doses                  | 1.512 (1.165 – 1.962)  | 0.002**  |
| Vaccination prior to COVID-19 | 3.062 (1.559 – 6.011)  | 0.001*** |
| Underlying conditions (Yes)   | 0.807 (0.472 – 1.380)  | 0.433    |
| Metabolic syndrome            | 0.813 (0.411 – 1.609)  | 0.553    |
| Pregnancy                     | 0.764 (0.308 – 1.895)  | 0.561    |
| No. of underlying conditions  | 1.024 (0.731 – 1.435)  | 0.889    |
| XBB.1                         | 0.333 (0.124 – 0.898)  | 0.030*   |
| XBB.2                         | 0.733 (0.219 – 2.454)  | 0.615    |
| XBB.3                         | 1.253 (0.510 – 3.081)  | 0.623    |
| XBB.5                         | 0.150 (0.014 – 1.560)  | 0.112    |
| <b>C) Moderate/Severe</b>     |                        |          |
| <b>Characteristics</b>        |                        |          |
| Age (5)                       | 1.121 (1.029 – 1.220)  | 0.009**  |
| Gender, male                  | 0.779 (0.387 – 1.468)  | 0.484    |
| Ct value                      | 1.047 (0.939 – 1.166)  | 0.409    |
| History of COVID-19           | 3.634 (1.691 – 7.807)  | 0.001*** |
| Vaccination (Yes)             | 4.889 (1.133 – 21.101) | 0.033*   |
| AZD1222                       | 5.946 (1.363 – 25.946) | 0.018*   |
| BBV152                        | 2.316 (0.402 – 13.353) | 0.348    |
| BNT162b/mRNA-1273             | 5.500 (0.674 – 44.903) | 0.112    |
| No. of doses                  | 1.541 (1.041 – 2.281)  | 0.031*   |
| Vaccination prior to COVID-19 | 0.725 (0.156 – 3.358)  | 0.681    |
| Underlying conditions (Yes)   | 0.996 (0.804 – 1.234)  | 0.973    |
| Metabolic syndrome            | 1.931 (0.855 – 4.360)  | 0.113    |
| Pregnancy                     | 4.223 (0.551 – 32.377) | 0.166    |
| No. of underlying conditions  | 1.380 (0.910 – 2.092)  | 0.130    |
| XBB.1                         | 1.087 (0.304 – 3.881)  | 0.898    |
| XBB.2                         | 1.250 (0.270 – 5.795)  | 0.776    |
| XBB.3                         | 0.750 (0.230 – 2.446)  | 0.633    |
| XBB.5                         | 3.333 (0.414 – 26.857) | 0.258    |
| <b>D) Hospitalization</b>     |                        |          |
| <b>Characteristics</b>        |                        |          |

|                               |                          |             |
|-------------------------------|--------------------------|-------------|
| Age (5)                       | 0.923 (0.862 – 0.989)    | 0.024*      |
| Gender, male                  | 0.628 (0.355 – 1.112)    | 0.111       |
| Ct value                      | 1.109 (1.008 – 1.221)    | 0.035*      |
| History of COVID-19           | 0.950 (0.468 – 1.932)    | 0.888       |
| Vaccination (Yes)             | 1.567 (1.035 – 2.373)    | 0.034*      |
| AZD1222                       | 1.333 (0.557 – 3.193)    | 0.519       |
| BBV152                        | 2.200 (0.756 – 6.402)    | 0.519       |
| BNT162b/mRNA-1273             | 2.667 (0.466 – 15.252)   | 0.270       |
| No. of doses                  | 1.201 (0.873 – 1.653)    | 0.260       |
| Vaccination prior to COVID-19 | 1.695 (0.712 – 4.032)    | 0.233       |
| Underlying conditions (Yes)   | 1.668 (0.768 – 1.930)    | 0.005**     |
| Metabolic syndrome            | 2.449 (1.230 – 4.876)    | 0.011*      |
| Pregnancy                     | 3.032 (1.241 – 7.408)    | 0.015*      |
| No. of underlying conditions  | 0.436 (0.299 – 0.636)    | <0.0001**** |
| XBB.1                         | 1.021 (0.334 – 3.117)    | 0.971       |
| XBB.2                         | 0.875 (0.233 – 3.284)    | 0.843       |
| XBB.3                         | 1.072 (0.410 – 2.803)    | 0.877       |
| XBB.5                         | 0 (0 – 0)                | 0.999       |
| <b>E) O2 support</b>          |                          |             |
| <b>Characteristics</b>        |                          |             |
| Age (5)                       | 0.750 (0.555 – 1.013)    | 0.061       |
| Gender, male                  | 0.888 (0.123 – 6.417)    | 0.906       |
| Ct value                      | 1.312 (0.890 – 1.933)    | 0.170       |
| History of COVID-19           | 0.733 (0.074 – 7.221)    | 0.790       |
| Vaccination (Yes)             | 3.081 (0.566 – 16.781)   | 0.193       |
| AZD1222                       | 12.174 (1.060 – 139.759) | 0.045*      |
| BBV152                        | 3.652 (0.314 – 42.480)   | 0.301       |
| BNT162b/mRNA-1273             | 14.156 (0 – 24.371)      | 0.999       |
| No. of doses                  | 1.777 (0.687 – 4.596)    | 0.236       |
| Vaccination prior to COVID-19 | 8.955 (1.201 – 66.755)   | 0.032*      |
| Underlying conditions (Yes)   | 1.276 (0.523 – 3.115)    | 0.593       |
| Metabolic syndrome            | 4.475 (0.612 – 32.728)   | 0.140       |

|                                     |                         |         |
|-------------------------------------|-------------------------|---------|
| Pregnancy                           | 0 (0 – 0)               | 0.998   |
| No. of underlying conditions        | 0.542 (0.196 – 1.496)   | 0.237   |
| XBB.1                               | 1.773 (0.106 – 29.760)  | 0.691   |
| XBB.2                               | 0.773 (0.045 – 13.268)  | 0.859   |
| XBB.3                               | 6.227 (0.376 – 103.241) | 0.202   |
| XBB.5                               | 73.651 (0 – 133.478)    | 0.999   |
| <b>F) HDU/ICU</b>                   |                         |         |
| <b>Characteristics</b>              |                         |         |
| Age (5)                             | 0.747 (0.582 – 0.958)   | 0.021*  |
| Gender, male                        | 0.435 (0.078 – 2.427)   | 0.343   |
| Ct value                            | 1.143 (0.860 – 1.519)   | 0.356   |
| History of COVID-19                 | 0.233 (0.045 – 1.196)   | 0.081   |
| Vaccination (Yes)                   | 4.217 (0.732 – 24.307)  | 0.107   |
| AZD1222                             | 2.978 (0.516 – 17.206)  | 0.223   |
| BBV152                              | 14.164 (0 – 25.163)     | 0.998   |
| BNT162b/mRNA-1273                   | 14.289 (0 – 31.144)     | 0.999   |
| No. of doses                        | 1.519 (0.675 – 3.416)   | 0.313   |
| Vaccination prior to COVID-19       | 4.432 (0.767 – 25.597)  | 0.096   |
| Underlying conditions (Yes)         | 0.933 (0.606 – 1.438)   | 0.755   |
| Metabolic syndrome                  | 4.564 (0.888 – 23.467)  | 0.069   |
| Pregnancy                           | 0 (0 – 0)               | 0.998   |
| No. of underlying conditions        | 0.517 (0.139 – 0.925)   | 0.006** |
| XBB.1                               | 1.773 (0.106 – 29.760)  | 0.691   |
| XBB.2                               | 7.660 (0 – 18.344)      | 0.998   |
| XBB.3                               | 3.091 (0.269 – 35.545)  | 0.365   |
| XBB.5                               | 0.045 (0.015 – 0.750)   | 0.131   |
| <b>G) Outcome: Terminal illness</b> |                         |         |
| <b>Characteristics</b>              |                         |         |
| Age (5)                             | 0.509 (0.313 – 0.828)   | 0.007** |
| Gender, male                        | 1.839 (0.330 – 10.231)  | 0.487   |
| Ct value                            | 1.272 (0.929 – 1.741)   | 0.134   |
| History of COVID-19                 | 0.480 (0.085 – 2.709)   | 0.406   |

|                               |                        |       |
|-------------------------------|------------------------|-------|
| Vaccination (Yes)             | 2.600 (0.707 – 9.560)  | 0.150 |
| AZD1222                       | 0 (0 – 0)              | 0.999 |
| BBV152                        | 0 (0 – 0)              | 0.999 |
| BNT162b/mRNA-1273             | 0 (0 – 0)              | 0.999 |
| No. of doses                  | 1.826 (0.877 – 3.801)  | 0.107 |
| Vaccination prior to COVID-19 | 2.267 (0.402 – 12.780) | 0.353 |
| Underlying conditions (Yes)   | 1.085 (0.195 – 6.049)  | 0.926 |
| Metabolic syndrome            | 0.961 (0.109 – 8.444)  | 0.971 |
| Pregnancy                     | 0 (0 – 0)              | 0.998 |
| No. of underlying conditions  | 0.937 (0.315 – 2.792)  | 0.907 |
| XBB.1                         | 0 (0 – 0)              | 0.999 |
| XBB.2                         | 0 (0 – 0)              | 0.999 |
| XBB.3                         | 0 (0 – 0)              | 0.999 |
| XBB.5                         | 0 (0 – 0)              | 0.999 |



**Supplemental Table 8:** COVID-19 cases reported in Tamil Nadu during September 2022 – January 2023

| <b>Month</b>       | <b>No. of samples tested</b> | <b>No. of positives</b> | <b>Positivity (%)</b> |
|--------------------|------------------------------|-------------------------|-----------------------|
| September 2022     | 491883                       | 15212                   | 3.1                   |
| October 2022       | 319863                       | 5073                    | 1.6                   |
| November 2022      | 230271                       | 1207                    | 0.5                   |
| December 2022      | 146438                       | 285                     | 0.2                   |
| January 2023       | 142585                       | 202                     | 0.1                   |
| <b>Grand total</b> | <b>1331040</b>               | <b>21979</b>            | <b>1.7</b>            |

Supplemental Figure 1: Emergence of XBB variant in Tamil Nadu during September 2022 – January 2023

**DIRECTORATE OF PUBLIC HEALTH AND PREVENTIVE MEDICINE**  
**WGS\_SARS CoV2\_Variants of Concern Reported in Tamil Nadu**

**January 2022 to January 2023**

(n=9044)

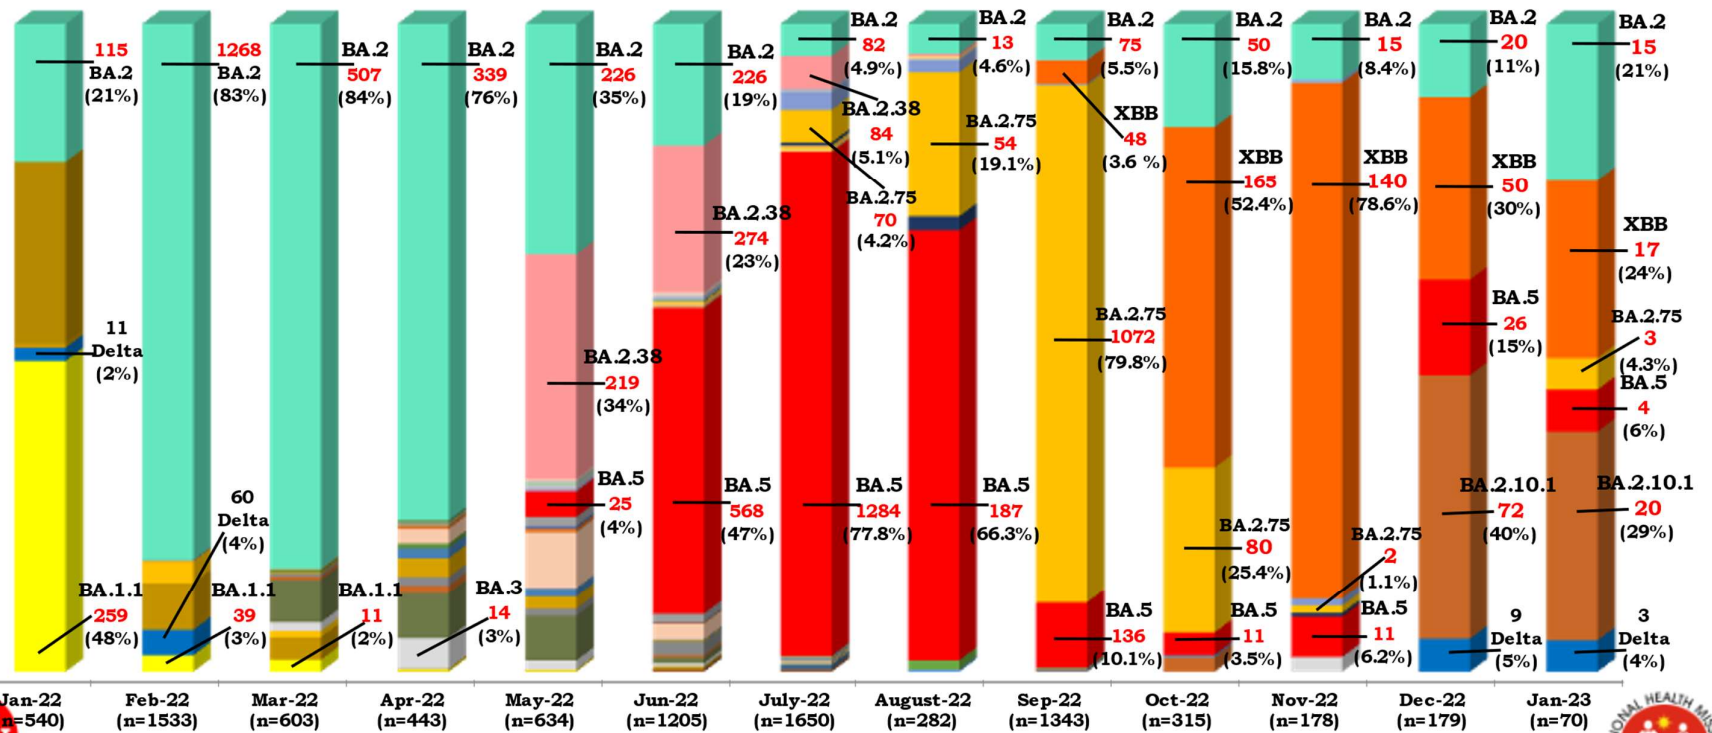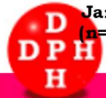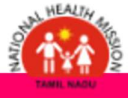

**Supplemental Figure 2: Threshold of quality control for consensus generation of sequences**

| Sequence name                 | QC          | Clade | Pango lineage (Nextclade) | WHO name | Mut. | non-ACGTN | Ns | Cov.  | Gaps | Ins. | FS   | SC   |
|-------------------------------|-------------|-------|---------------------------|----------|------|-----------|----|-------|------|------|------|------|
| 2019-nCoV_MN908947 Sample 228 | N M P C F S | 22F   | XBB.1                     | Omicron  | 91   | 0         | 0  | 99.5% | 57   | 0    | 1(1) | 0    |
| 2019-nCoV_MN908947 Sample 27  | N M P C F S | 22F   | XBB.5                     | Omicron  | 104  | 0         | 0  | 99.6% | 63   | 4    | 1(1) | 0    |
| 2019-nCoV_MN908947 Sample 178 | N M P C F S | 22F   | XBB.1                     | Omicron  | 100  | 0         | 0  | 99.7% | 84   | 6    | 1(1) | 0(1) |
| 2019-nCoV_MN908947 Sample 206 | N M P C F S | 22F   | XBB.5                     | Omicron  | 88   | 0         | 0  | 99.6% | 88   | 0    | 1(1) | 0    |
| 2019-nCoV_MN908947 94         | N M P C F S | 22F   | XBB.3                     | Omicron  | 93   | 0         | 0  | 99.5% | 143  | 0    | 2(2) | 0    |
| 2019-nCoV_MN908947 Sample 243 | N M P C F S | 23A   | XBB.1.5                   | Omicron  | 94   | 0         | 0  | 99.6% | 126  | 0    | 2(2) | 0(1) |
| 2019-nCoV_MN908947 Sample 208 | N M P C F S | 23A   | XBB.1.5                   | Omicron  | 83   | 0         | 0  | 99.5% | 282  | 1    | 1(1) | 0(1) |
| 2019-nCoV_MN908947 Sample 18  | N M P C F S | 22F   | XBB.3                     | Omicron  | 96   | 0         | 0  | 99.6% | 208  | 4    | 2(2) | 0    |
| 2019-nCoV_MN908947 Sample 242 | N M P C F S | 22F   | XBB.1                     | Omicron  | 97   | 0         | 0  | 99.6% | 78   | 4    | 2(2) | 0(1) |
| 2019-nCoV_MN908947 Sample 202 | N M P C F S | 22F   | XBB.1.9                   | Omicron  | 87   | 0         | 0  | 99.5% | 89   | 0    | 1(1) | 0(1) |
| 2019-nCoV_MN908947 177        | N M P C F S | 22F   | XBB.1.39                  | Omicron  | 83   | 0         | 0  | 99.5% | 90   | 0    | 1(1) | 0(1) |
| 2019-nCoV_MN908947 Sample 200 | N M P C F S | 22F   | XBB.2.1                   | Omicron  | 94   | 0         | 0  | 99.5% | 176  | 0    | 2(3) | 0    |
| 2019-nCoV_MN908947 Sample 234 | N M P C F S | 22F   | FL.2                      | Omicron  | 90   | 0         | 0  | 99.5% | 107  | 0    | 1(1) | 0(1) |
| 2019-nCoV_MN908947 59         | N M P C F S | 22F   | XBB                       | Omicron  | 87   | 0         | 0  | 99.6% | 223  | 0    | 3(4) | 0    |
| 2019-nCoV_MN908947 Sample 44  | N M P C F S | 22F   | XBB.3                     | Omicron  | 91   | 0         | 0  | 99.5% | 98   | 0    | 3(3) | 0    |
| 2019-nCoV_MN908947 Sample 42  | N M P C F S | 22F   | XBB                       | Omicron  | 90   | 0         | 0  | 99.5% | 126  | 2    | 3(4) | 0    |
| 2019-nCoV_MN908947 Sample 240 | N M P C F S | 22F   | XBB.1                     | Omicron  | 83   | 0         | 0  | 99.5% | 272  | 1    | 3(3) | 0    |
| 2019-nCoV_MN908947 Sample 188 | N M P C F S | 22F   | XBB.1                     | Omicron  | 95   | 0         | 0  | 99.6% | 136  | 2    | 3(4) | 0(1) |
| 2019-nCoV_MN908947 Sample 241 | N M P C F S | 22F   | FL.5                      | Omicron  | 89   | 0         | 0  | 99.5% | 93   | 0    | 1(1) | 0(1) |
| 2019-nCoV_MN908947 Sample 180 | N M P C F S | 22F   | XBB.1.9                   | Omicron  | 104  | 0         | 0  | 99.3% | 319  | 8    | 4(5) | 0(1) |
| 2019-nCoV_MN908947 Sample 192 | N M P C F S | 22F   | XBB.1                     | Omicron  | 160  | 0         | 0  | 99.3% | 122  | 10   | 3(3) | 0(1) |
| 2019-nCoV_MN908947 Sample 182 | N M P C F S | 22F   | XBB.6                     | Omicron  | 105  | 0         | 0  | 99.5% | 705  | 0    | 5(5) | 0    |

| Sequence name                 | QC          | Clade | Pango lineage (Nextclade) | WHO name | Mut. | non-ACGTN | Ns | Cov.  | Gaps | Ins. | FS   | SC   |
|-------------------------------|-------------|-------|---------------------------|----------|------|-----------|----|-------|------|------|------|------|
| 2019-nCoV_MN908947 Sample 199 | N M P C F S | 22F   | XBB.1                     | Omicron  | 84   | 0         | 0  | 99.6% | 284  | 0    | 1(1) | 0    |
| 2019-nCoV_MN908947 Sample 209 | N M P C F S | 23A   | XBB.1.5                   | Omicron  | 91   | 0         | 0  | 99.5% | 57   | 0    | 1(1) | 0(1) |
| 2019-nCoV_MN908947 Sample 217 | N M P C F S | 22F   | XBB.3                     | Omicron  | 94   | 0         | 0  | 99.6% | 78   | 0    | 1(1) | 0    |
| 2019-nCoV_MN908947 Sample 238 | N M P C F S | 23A   | XBB.1.5.18                | Omicron  | 92   | 0         | 0  | 99.6% | 79   | 0    | 1(1) | 0(1) |
| 2019-nCoV_MN908947 Sample 191 | N M P C F S | 22F   | XBB.1                     | Omicron  | 101  | 0         | 0  | 99.6% | 56   | 0    | 0    | 0    |
| 2019-nCoV_MN908947 163        | N M P C F S | 22F   | XBB                       | Omicron  | 89   | 0         | 0  | 99.6% | 57   | 0    | 1(1) | 0    |
| 2019-nCoV_MN908947 Sample 195 | N M P C F S | 22F   | XBB.1                     | Omicron  | 94   | 0         | 0  | 99.5% | 91   | 0    | 1(1) | 0    |
| 2019-nCoV_MN908947 Sample 143 | N M P C F S | 22F   | XBB.3                     | Omicron  | 90   | 0         | 0  | 99.6% | 57   | 0    | 1(1) | 0    |
| 2019-nCoV_MN908947 Sample 181 | N M P C F S | 22F   | XBB.3                     | Omicron  | 91   | 0         | 0  | 99.5% | 57   | 0    | 1(1) | 0    |
| 2019-nCoV_MN908947 Sample 197 | N M P C F S | 22F   | XBB.3                     | Omicron  | 98   | 0         | 0  | 99.6% | 78   | 0    | 1(1) | 0    |
| 2019-nCoV_MN908947 161        | N M P C F S | 22F   | XBB.3                     | Omicron  | 92   | 0         | 0  | 99.6% | 57   | 0    | 1(1) | 0    |
| 2019-nCoV_MN908947 Sample 244 | N M P C F S | 22F   | FL.5                      | Omicron  | 97   | 0         | 0  | 99.5% | 153  | 0    | 1(1) | 0(1) |
| 2019-nCoV_MN908947 Sample 215 | N M P C F S | 22F   | XBB.1                     | Omicron  | 83   | 0         | 0  | 99.5% | 175  | 0    | 1(1) | 0(1) |
| 2019-nCoV_MN908947 Sample 229 | N M P C F S | 22F   | XBB.1                     | Omicron  | 95   | 0         | 0  | 99.7% | 57   | 0    | 1(1) | 0(1) |
| 2019-nCoV_MN908947 Sample 190 | N M P C F S | 22F   | XBB.2.8                   | Omicron  | 94   | 0         | 0  | 99.5% | 57   | 1    | 1(1) | 0    |
| 2019-nCoV_MN908947 Sample 205 | N M P C F S | 22F   | XBB.5                     | Omicron  | 95   | 0         | 0  | 99.6% | 57   | 0    | 1(1) | 0    |
| 2019-nCoV_MN908947 Sample 233 | N M P C F S | 22F   | XBB.2                     | Omicron  | 96   | 0         | 0  | 99.5% | 57   | 0    | 1(1) | 0    |
| 2019-nCoV_MN908947 Sample 203 | N M P C F S | 22F   | XBB                       | Omicron  | 96   | 0         | 0  | 99.7% | 87   | 0    | 1(1) | 0    |
| 2019-nCoV_MN908947 Sample 214 | N M P C F S | 22F   | XBB                       | Omicron  | 96   | 0         | 0  | 99.7% | 87   | 0    | 1(1) | 0    |
| 2019-nCoV_MN908947 Sample 226 | N M P C F S | 22F   | XBB.1                     | Omicron  | 94   | 0         | 0  | 99.5% | 82   | 0    | 1(1) | 0(1) |
| 2019-nCoV_MN908947 Sample 230 | N M P C F S | 22F   | XBB                       | Omicron  | 97   | 0         | 0  | 99.5% | 166  | 0    | 1(1) | 0    |
| 2019-nCoV_MN908947 Sample 211 | N M P C F S | 23A   | XBB.1.5                   | Omicron  | 95   | 0         | 0  | 99.5% | 71   | 0    | 0    | 0(1) |

| Sequence name                 | QC          | Clade | Pango lineage (Nextclade) | WHO name | Mut | non-ACGTN | Ns | Cov.  | Gaps | Ins. | FS    | SC    |
|-------------------------------|-------------|-------|---------------------------|----------|-----|-----------|----|-------|------|------|-------|-------|
| 2019-nCoV_MN908947 Sample 189 | N M P C F S | 22F   | XBB.1.9                   | Omicron  | 89  | 0         | 0  | 99.6% | 56   | 0    | 0     | 0 (1) |
| 2019-nCoV_MN908947 Sample 194 | N M P C F S | 22F   | XBB.1.15                  | Omicron  | 93  | 0         | 0  | 99.6% | 77   | 0    | 0     | 0 (1) |
| 2019-nCoV_MN908947 Sample 225 | N M P C F S | 22F   | XBB.1                     | Omicron  | 94  | 0         | 0  | 99.5% | 56   | 0    | 0     | 0 (1) |
| 2019-nCoV_MN908947 Sample 198 | N M P C F S | 22F   | XBB.3                     | Omicron  | 87  | 0         | 0  | 99.5% | 56   | 0    | 0     | 0     |
| 2019-nCoV_MN908947 Sample 235 | N M P C F S | 22F   | XBB.1                     | Omicron  | 93  | 0         | 0  | 99.8% | 56   | 0    | 0     | 0 (1) |
| 2019-nCoV_MN908947 Sample 239 | N M P C F S | 22F   | XBB.1                     | Omicron  | 95  | 0         | 0  | 99.6% | 56   | 0    | 0     | 0 (1) |
| 2019-nCoV_MN908947 Sample 193 | N M P C F S | 22F   | XBB.2                     | Omicron  | 95  | 0         | 0  | 99.5% | 56   | 0    | 0     | 0     |
| 2019-nCoV_MN908947 19         | N M P C F S | 22F   | XBB.3                     | Omicron  | 90  | 0         | 0  | 99.5% | 56   | 0    | 0     | 0     |
| 2019-nCoV_MN908947 144        | N M P C F S | 22F   | XBB.1                     | Omicron  | 88  | 0         | 0  | 99.6% | 57   | 1    | 1 (1) | 0     |
| 2019-nCoV_MN908947 41         | N M P C F S | 22F   | XBB.3                     | Omicron  | 88  | 0         | 0  | 99.6% | 74   | 0    | 1 (1) | 0     |
| 2019-nCoV_MN908947 61         | N M P C F S | 22F   | XBB.5                     | Omicron  | 90  | 0         | 0  | 99.5% | 72   | 0    | 1 (1) | 0     |
| 2019-nCoV_MN908947 Sample 222 | N M P C F S | 22F   | XBB.1                     | Omicron  | 91  | 0         | 0  | 99.5% | 99   | 0    | 1 (1) | 0 (1) |
| 2019-nCoV_MN908947 Sample 29  | N M P C F S | 22F   | XBB.3                     | Omicron  | 92  | 0         | 0  | 99.5% | 88   | 0    | 1 (1) | 0     |
| 2019-nCoV_MN908947 Sample 82  | N M P C F S | 22F   | XBB.3                     | Omicron  | 89  | 0         | 0  | 99.5% | 143  | 0    | 1 (1) | 0     |
| 2019-nCoV_MN908947 95         | N M P C F S | 22F   | XBB.3                     | Omicron  | 93  | 0         | 0  | 99.3% | 126  | 0    | 1 (1) | 0     |
| 2019-nCoV_MN908947 Sample 124 | N M P C F S | 22F   | XBB                       | Omicron  | 91  | 0         | 0  | 99.5% | 235  | 0    | 1 (1) | 0     |
| 2019-nCoV_MN908947 Sample 213 | N M P C F S | 23A   | XBB.1.5                   | Omicron  | 91  | 0         | 0  | 99.5% | 68   | 1    | 1 (1) | 0 (1) |
| 2019-nCoV_MN908947 Sample 212 | N M P C F S | 22F   | XBB.1                     | Omicron  | 94  | 0         | 0  | 99.5% | 183  | 0    | 1 (1) | 0 (1) |
| 2019-nCoV_MN908947 Sample 231 | N M P C F S | 22F   | FL.10                     | Omicron  | 96  | 0         | 0  | 99.5% | 57   | 0    | 1 (1) | 0 (1) |
| 2019-nCoV_MN908947 Sample 201 | N M P C F S | 22F   | XBB.3                     | Omicron  | 93  | 0         | 0  | 99.6% | 57   | 0    | 1 (1) | 0     |
| 2019-nCoV_MN908947 Sample 207 | N M P C F S | 22F   | XBB.3                     | Omicron  | 91  | 0         | 0  | 99.5% | 68   | 0    | 1 (2) | 0     |
| 2019-nCoV_MN908947 Sample 43  | N M P C F S | 22F   | XBB.3                     | Omicron  | 92  | 0         | 0  | 99.5% | 57   | 0    | 1 (1) | 0     |

|                               |             |     |            |         |    |   |   |       |     |   |   |       |
|-------------------------------|-------------|-----|------------|---------|----|---|---|-------|-----|---|---|-------|
| 2019-nCoV_MN908947 133        | N M P C F S | 22F | XBB.3      | Omicron | 90 | 0 | 0 | 99.5% | 56  | 0 | 0 | 0     |
| 2019-nCoV_MN908947 24         | N M P C F S | 22F | XBB.3      | Omicron | 91 | 0 | 0 | 99.5% | 56  | 0 | 0 | 0     |
| 2019-nCoV_MN908947 40         | N M P C F S | 22F | XBB.3      | Omicron | 89 | 0 | 0 | 99.5% | 74  | 0 | 0 | 0     |
| 2019-nCoV_MN908947 77         | N M P C F S | 22F | XBB.5      | Omicron | 91 | 0 | 0 | 99.5% | 56  | 0 | 0 | 0     |
| 2019-nCoV_MN908947 Sample 232 | N M P C F S | 22F | XBB.2.3    | Omicron | 94 | 0 | 0 | 99.6% | 56  | 0 | 0 | 0     |
| 2019-nCoV_MN908947 162        | N M P C F S | 22F | XBB.3      | Omicron | 91 | 0 | 0 | 99.5% | 56  | 0 | 0 | 0     |
| 2019-nCoV_MN908947 60         | N M P C F S | 22F | XBB.3      | Omicron | 90 | 0 | 0 | 99.6% | 61  | 0 | 0 | 0     |
| 2019-nCoV_MN908947 Sample 227 | N M P C F S | 22F | XBB.1      | Omicron | 91 | 0 | 0 | 99.5% | 128 | 0 | 0 | 0 (1) |
| 2019-nCoV_MN908947 174        | N M P C F S | 22F | XBB.3      | Omicron | 93 | 0 | 0 | 99.6% | 56  | 0 | 0 | 0     |
| 2019-nCoV_MN908947 Sample 160 | N M P C F S | 22F | XBB.3      | Omicron | 91 | 0 | 0 | 99.5% | 89  | 0 | 0 | 0     |
| 2019-nCoV_MN908947 Sample 184 | N M P C F S | 22F | XBB.1.9    | Omicron | 90 | 0 | 0 | 99.5% | 56  | 0 | 0 | 0 (1) |
| 2019-nCoV_MN908947 Sample 221 | N M P C F S | 22F | XBB.2      | Omicron | 93 | 0 | 0 | 99.7% | 56  | 0 | 0 | 0     |
| 2019-nCoV_MN908947 52         | N M P C F S | 22F | XBB.1      | Omicron | 87 | 0 | 0 | 99.5% | 56  | 0 | 0 | 0     |
| 2019-nCoV_MN908947 Sample 237 | N M P C F S | 23A | XBB.1.5.18 | Omicron | 94 | 0 | 0 | 99.5% | 56  | 0 | 0 | 0 (1) |
| 2019-nCoV_MN908947 Sample 28  | N M P C F S | 22F | XBB.3      | Omicron | 93 | 0 | 0 | 99.7% | 90  | 0 | 0 | 0     |
| 2019-nCoV_MN908947 76         | N M P C F S | 22F | XBB.3      | Omicron | 93 | 0 | 0 | 99.5% | 56  | 0 | 0 | 0     |
| 2019-nCoV_MN908947 Sample 185 | N M P C F S | 22F | XBB.1.9    | Omicron | 91 | 0 | 0 | 99.7% | 86  | 0 | 0 | 0 (1) |
| 2019-nCoV_MN908947 Sample 186 | N M P C F S | 22F | XBB.1.9    | Omicron | 92 | 0 | 0 | 99.4% | 30  | 0 | 0 | 0 (1) |
| 2019-nCoV_MN908947 Sample 187 | N M P C F S | 22F | XBB.1.9    | Omicron | 92 | 0 | 0 | 99.5% | 53  | 0 | 0 | 0 (1) |
| 2019-nCoV_MN908947 Sample 204 | N M P C F S | 22F | XBB.3      | Omicron | 89 | 0 | 0 | 99.6% | 56  | 0 | 0 | 0     |
| 2019-nCoV_MN908947 Sample 179 | N M P C F S | 22F | XBB.1      | Omicron | 90 | 0 | 0 | 99.5% | 56  | 0 | 0 | 0     |
| 2019-nCoV_MN908947 Sample 223 | N M P C F S | 22F | XBB.2      | Omicron | 94 | 0 | 0 | 99.6% | 127 | 0 | 0 | 0     |

Back Done. Total sequences: 1. Succeeded: 1

| # | Sequence name                 | QC  | Clade | Pango lineage (Nextclade) | WHO name | Mut. | non-ACGTN | Ns | Cov.  | Gaps | Ins. | FS | SC    | Nucleotide sequence |
|---|-------------------------------|-----|-------|---------------------------|----------|------|-----------|----|-------|------|------|----|-------|---------------------|
| 0 | 2019-nCoV_MN908947 Sample 239 | 100 | 22F   | XBB.1                     | Omicron  | 95   | 0         | 0  | 99.6% | 56   | 0    | 0  | 0 [1] |                     |

Genome annotation ?
